# Supplementary material
Source: publisher site journal article supplement (https://www.spandidos-publications.com/2137/downloadSupplementary)
Supplement: Supplementary file 1 [file downloadSupplementary]

## Sheet: Supplementary table III
Table SIII. Differentially expressed molecular functions of GO enrichment.
maxLevel	Levels	GO_Name	GO_ID	P-value	P-value_adjusted	Genes	Count	Pop_Hit	List_Total	Background_Genes	URL
6	6	poly(A) RNA binding	GO:0044822	9.58×10-16	4.62×10-13	CDKN2A|1.86;GTF2F1|1.8;GIGYF2|1.72;SRRM1|1.69;ZNF598|1.6;MRPL21|0.74;HDAC2|0.73;SLTM|0.73;MRPL54|0.72;YBX3|0.72;SERPINH1|0.72;DHX30|0.72;TUFM|0.71;C1QBP|0.7;PNPT1|0.69;HNRNPR|0.69;TOP1|0.68;MDH2|0.68;CS|0.68;FUS|0.67;PARP1|0.66;GANAB|0.64;TOP2A|0.6;BMS1|0.54;EWSR1|0.53;SSRP1|0.5	26	1244	107	37689	http://www.ebi.ac.uk/QuickGO/GTerm?id=GO:0044822
3	3	protein binding	GO:0005515	3.13×10-13	7.57×10-11	NDRG1|1.88;CDKN2A|1.86;GTF2F1|1.8;PSMA1|1.74;SLK|1.69;SRRM1|1.69;STMN1|1.67;CLIP1|1.66;DBNL|1.6;S100A11|1.58;SRI|1.57;PPP1R12A|1.54;UBE2K|1.53;S100A6|1.52;TAGLN2|1.51;DDOST|0.74;TECR|0.74;ATP6V0D1|0.74;AIFM1|0.74;SMARCA4|0.74;BSG|0.73;ACP2|0.73;ALCAM|0.73;ITGA5|0.73;STT3A|0.73;HDAC2|0.73;GNS|0.73;ECH1|0.72;YBX3|0.72;SERPINH1|0.72;DHX30|0.72;GLS|0.72;TRRAP|0.72;TUFM|0.71;MLEC|0.71;HM13|0.71;PTPMT1…	75	13364	107	37689	http://www.ebi.ac.uk/QuickGO/GTerm?id=GO:0005515
5	5	RNA binding	GO:0003723	1.64×10-10	2.64×10-8	CDKN2A|1.86;GTF2F1|1.8;PSMA1|1.74;GIGYF2|1.72;SRRM1|1.69;ZNF598|1.6;MRPL21|0.74;HDAC2|0.73;SLTM|0.73;MRPL54|0.72;YBX3|0.72;SERPINH1|0.72;DHX30|0.72;TUFM|0.71;C1QBP|0.7;PNPT1|0.69;HNRNPR|0.69;TOP1|0.68;MDH2|0.68;CS|0.68;FUS|0.67;PARP1|0.66;GANAB|0.64;TOP2A|0.6;BMS1|0.54;EWSR1|0.53;SSRP1|0.5	27	2288	107	37689	http://www.ebi.ac.uk/QuickGO/GTerm?id=GO:0003723
2	2	binding	GO:0005488	5.14×10-7	6.21×10-5	NDRG1|1.88;CDKN2A|1.86;GTF2F1|1.8;PSMA1|1.74;GIGYF2|1.72;SLK|1.69;SRRM1|1.69;STMN1|1.67;CLIP1|1.66;DBNL|1.6;ZNF598|1.6;S100A11|1.58;SRI|1.57;PPP1R12A|1.54;UBE2K|1.53;S100A6|1.52;TAGLN2|1.51;DDOST|0.74;LPCAT1|0.74;MRPL21|0.74;TECR|0.74;ATP6V0D1|0.74;AIFM1|0.74;MUT|0.74;SMARCA4|0.74;OAT|0.73;FKBP10|0.73;BSG|0.73;ACP2|0.73;DLD|0.73;ALCAM|0.73;ITGA5|0.73;STT3A|0.73;HDAC2|0.73;GNS|0.73;SLTM|0.73;ECH1|…	97	26644	107	37689	http://www.ebi.ac.uk/QuickGO/GTerm?id=GO:0005488
3	3	macromolecular complex binding	GO:0044877	7.38×10-7	7.12×10-5	NDRG1|1.88;CLIP1|1.66;DBNL|1.6;TAGLN2|1.51;ATP6V0D1|0.74;SMARCA4|0.74;ITGA5|0.73;HDAC2|0.73;SERPINH1|0.72;DHX30|0.72;KIF2A|0.71;C1QBP|0.7;SMARCA5|0.7;CTSS|0.7;ATP1B1|0.69;TOP1|0.68;PARP1|0.66;TOP2A|0.6;SSRP1|0.5;CD44|0.47	20	1989	107	37689	http://www.ebi.ac.uk/QuickGO/GTerm?id=GO:0044877
3	3	oxidoreductase activity	GO:0016491	2.13×10-5	1.72×10-3	TECR|0.74;AIFM1|0.74;PDHA1|0.74;DLD|0.73;NDUFA10|0.71;CYBA|0.7;NDUFA13|0.7;DHRS7|0.69;ETHE1|0.68;MDH2|0.68;PDHB|0.67;ACAD9|0.64;ASPH|0.63;PCYOX1|0.61;ERO1L|0.58;GSTK1|0.56;HSD17B4|0.54	17	1875	107	37689	http://www.ebi.ac.uk/QuickGO/GTerm?id=GO:0016491
4	4	protein complex binding	GO:0032403	3.16×10-5	2.18×10-3	NDRG1|1.88;CLIP1|1.66;DBNL|1.6;TAGLN2|1.51;ATP6V0D1|0.74;SMARCA4|0.74;ITGA5|0.73;HDAC2|0.73;SERPINH1|0.72;KIF2A|0.71;SMARCA5|0.7;CTSS|0.7;ATP1B1|0.69;CD44|0.47	14	1360	107	37689	http://www.ebi.ac.uk/QuickGO/GTerm?id=GO:0032403
5	5	NF-kappaB binding	GO:0051059	6.92×10-5	3.49×10-3	CDKN2A|1.86;HDAC2|0.73;DNAJA3|0.69	3	28	107	37689	http://www.ebi.ac.uk/QuickGO/GTerm?id=GO:0051059
2	2	catalytic activity	GO:0003824	7.15×10-5	3.49×10-3	GTF2F1|1.8;PSMA1|1.74;SLK|1.69;SRI|1.57;UBE2K|1.53;DDOST|0.74;LPCAT1|0.74;TECR|0.74;ATP6V0D1|0.74;AIFM1|0.74;APMAP|0.74;MUT|0.74;PDHA1|0.74;SMARCA4|0.74;OAT|0.73;FKBP10|0.73;ACP2|0.73;DLD|0.73;STT3A|0.73;HDAC2|0.73;GNS|0.73;ECH1|0.72;NARS2|0.72;ATP5L|0.72;DHX30|0.72;GLS|0.72;TRRAP|0.72;TUFM|0.71;HM13|0.71;PTPMT1|0.71;KIF2A|0.71;NDUFA10|0.71;CYBA|0.7;LSG1|0.7;SMARCA5|0.7;CTSS|0.7;NDUFA13|0.7;CARS2…	62	14808	107	37689	http://www.ebi.ac.uk/QuickGO/GTerm?id=GO:0003824
6	6	pyruvate dehydrogenase (acetyl-transferring) activity	GO:0004739	7.94×10-5	3.49×10-3	PDHA1|0.74;PDHB|0.67	2	5	107	37689	http://www.ebi.ac.uk/QuickGO/GTerm?id=GO:0004739
5	5	pyruvate dehydrogenase activity	GO:0004738	7.94×10-5	3.49×10-3	PDHA1|0.74;PDHB|0.67	2	5	107	37689	http://www.ebi.ac.uk/QuickGO/GTerm?id=GO:0004738
4	4	transcription factor binding	GO:0008134	1.20×10-4	4.82×10-3	CDKN2A|1.86;GTF2F1|1.8;SRI|1.57;SMARCA4|0.74;HDAC2|0.73;C1QBP|0.7;DNAJA3|0.69;FUS|0.67;PARP1|0.66	9	664	107	37689	http://www.ebi.ac.uk/QuickGO/GTerm?id=GO:0008134
4	4	enzyme binding	GO:0019899	1.75×10-4	6.49×10-3	NDRG1|1.88;CDKN2A|1.86;SRI|1.57;PPP1R12A|1.54;UBE2K|1.53;SMARCA4|0.74;HDAC2|0.73;YBX3|0.72;MLEC|0.71;HM13|0.71;C1QBP|0.7;CSPG4|0.69;ATP1B1|0.69;DNAJA3|0.69;PARP1|0.66;TOP2A|0.6	16	2010	107	37689	http://www.ebi.ac.uk/QuickGO/GTerm?id=GO:0019899
3	3	organic cyclic compound binding	GO:0097159	2.68×10-4	9.00×10-3	CDKN2A|1.86;GTF2F1|1.8;PSMA1|1.74;GIGYF2|1.72;SLK|1.69;SRRM1|1.69;CLIP1|1.66;ZNF598|1.6;UBE2K|1.53;MRPL21|0.74;AIFM1|0.74;MUT|0.74;SMARCA4|0.74;OAT|0.73;FKBP10|0.73;DLD|0.73;HDAC2|0.73;SLTM|0.73;MRPL54|0.72;NARS2|0.72;YBX3|0.72;SERPINH1|0.72;DHX30|0.72;TUFM|0.71;KIF2A|0.71;NDUFA10|0.71;C1QBP|0.7;CYBA|0.7;LSG1|0.7;SMARCA5|0.7;NDUFA13|0.7;CARS2|0.7;ERLIN1|0.69;CDK1|0.69;DNAJA3|0.69;CYB5B|0.69;PNPT1…	55	13059	107	37689	http://www.ebi.ac.uk/QuickGO/GTerm?id=GO:0097159
4	4	oxidoreductase activity, acting on NAD(P)H	GO:0016651	2.81×10-4	9.00×10-3	AIFM1|0.74;DLD|0.73;NDUFA10|0.71;CYBA|0.7;NDUFA13|0.7	5	201	107	37689	http://www.ebi.ac.uk/QuickGO/GTerm?id=GO:0016651
4	4	chromatin binding	GO:0003682	3.16×10-4	9.00×10-3	SMARCA4|0.74;HDAC2|0.73;DHX30|0.72;SMARCA5|0.7;TOP1|0.68;PARP1|0.66;TOP2A|0.6;SSRP1|0.5	8	598	107	37689	http://www.ebi.ac.uk/QuickGO/GTerm?id=GO:0003682
4	4	oxidoreductase activity, acting on a sulfur group of donors	GO:0016667	3.33×10-4	9.00×10-3	DLD|0.73;PCYOX1|0.61;ERO1L|0.58;GSTK1|0.56	4	115	107	37689	http://www.ebi.ac.uk/QuickGO/GTerm?id=GO:0016667
5	5	DNA topoisomerase II activity	GO:0061505	3.54×10-4	9.00×10-3	TOP1|0.68;TOP2A|0.6	2	10	107	37689	http://www.ebi.ac.uk/QuickGO/GTerm?id=GO:0061505
11	6,11	DNA topoisomerase type II (ATP-hydrolyzing) activity	GO:0003918	3.54×10-4	9.00×10-3	TOP1|0.68;TOP2A|0.6	2	10	107	37689	http://www.ebi.ac.uk/QuickGO/GTerm?id=GO:0003918
3	3	isomerase activity	GO:0016853	4.11×10-4	9.92×10-3	MUT|0.74;FKBP10|0.73;ECH1|0.72;TOP1|0.68;TOP2A|0.6;ERO1L|0.58;HSD17B4|0.54	7	472	107	37689	http://www.ebi.ac.uk/QuickGO/GTerm?id=GO:0016853
3	3	heterocyclic compound binding	GO:1901363	4.36×10-4	1.00×10-2	CDKN2A|1.86;GTF2F1|1.8;PSMA1|1.74;GIGYF2|1.72;SLK|1.69;SRRM1|1.69;CLIP1|1.66;ZNF598|1.6;UBE2K|1.53;MRPL21|0.74;AIFM1|0.74;MUT|0.74;SMARCA4|0.74;OAT|0.73;FKBP10|0.73;DLD|0.73;HDAC2|0.73;SLTM|0.73;MRPL54|0.72;NARS2|0.72;YBX3|0.72;SERPINH1|0.72;DHX30|0.72;TUFM|0.71;KIF2A|0.71;NDUFA10|0.71;C1QBP|0.7;CYBA|0.7;LSG1|0.7;SMARCA5|0.7;NDUFA13|0.7;CARS2|0.7;CDK1|0.69;DNAJA3|0.69;CYB5B|0.69;PNPT1|0.69;HNRNPR…	54	12955	107	37689	http://www.ebi.ac.uk/QuickGO/GTerm?id=GO:1901363
5	5	nucleosome binding	GO:0031491	5.82×10-4	1.28×10-2	SMARCA4|0.74;HDAC2|0.73;SMARCA5|0.7	3	57	107	37689	http://www.ebi.ac.uk/QuickGO/GTerm?id=GO:0031491
4	4	S100 protein binding	GO:0044548	6.10×10-4	1.28×10-2	S100A11|1.58;S100A6|1.52	2	13	107	37689	http://www.ebi.ac.uk/QuickGO/GTerm?id=GO:0044548
8	8	ATPase activity	GO:0016887	6.65×10-4	1.31×10-2	ATP6V0D1|0.74;SMARCA4|0.74;ATP5L|0.72;DHX30|0.72;KIF2A|0.71;SMARCA5|0.7;ATP1B1|0.69;TOP1|0.68;CLPX|0.67;PCYOX1|0.61;TOP2A|0.6	11	1210	107	37689	http://www.ebi.ac.uk/QuickGO/GTerm?id=GO:0016887
7	7	ATPase activity, coupled to transmembrane movement of ions, phosphorylative mechanism	GO:0015662	6.77×10-4	1.31×10-2	ATP6V0D1|0.74;ATP1B1|0.69;PCYOX1|0.61	3	60	107	37689	http://www.ebi.ac.uk/QuickGO/GTerm?id=GO:0015662
7	7	dolichyl-diphosphooligosaccharide-protein glycotransferase activity	GO:0004579	8.18×10-4	1.52×10-2	DDOST|0.74;STT3A|0.73	2	15	107	37689	http://www.ebi.ac.uk/QuickGO/GTerm?id=GO:0004579
4	4	identical protein binding	GO:0042802	1.06×10-3	1.90×10-2	SLK|1.69;CLIP1|1.66;S100A11|1.58;SRI|1.57;S100A6|1.52;HM13|0.71;FUS|0.67;PARP1|0.66;TOP2A|0.6;HSD17B4|0.54;EWSR1|0.53	11	1282	107	37689	http://www.ebi.ac.uk/QuickGO/GTerm?id=GO:0042802
7	7	steroid hormone receptor binding	GO:0035258	1.25×10-3	2.15×10-2	SMARCA4|0.74;PHB2|0.67;FUS|0.67	3	74	107	37689	http://www.ebi.ac.uk/QuickGO/GTerm?id=GO:0035258
3	3	small molecule binding	GO:0036094	1.40×10-3	2.34×10-2	SLK|1.69;UBE2K|1.53;AIFM1|0.74;MUT|0.74;SMARCA4|0.74;DLD|0.73;SLTM|0.73;NARS2|0.72;DHX30|0.72;TUFM|0.71;KIF2A|0.71;NDUFA10|0.71;LSG1|0.7;SMARCA5|0.7;NDUFA13|0.7;CARS2|0.7;ERLIN1|0.69;CDK1|0.69;DNAJA3|0.69;HNRNPR|0.69;HYOU1|0.69;CLPX|0.67;FUS|0.67;PARP1|0.66;ACAD9|0.64;MCCC2|0.64;LARS2|0.64;TOP2A|0.6;BMS1|0.54;EWSR1|0.53	30	6110	107	37689	http://www.ebi.ac.uk/QuickGO/GTerm?id=GO:0036094
6	6	oligosaccharyl transferase activity	GO:0004576	1.47×10-3	2.35×10-2	DDOST|0.74;STT3A|0.73	2	20	107	37689	http://www.ebi.ac.uk/QuickGO/GTerm?id=GO:0004576
6	6	protein kinase binding	GO:0019901	1.55×10-3	2.35×10-2	CDKN2A|1.86;PPP1R12A|1.54;C1QBP|0.7;CSPG4|0.69;DNAJA3|0.69;PARP1|0.66;TOP2A|0.6	7	593	107	37689	http://www.ebi.ac.uk/QuickGO/GTerm?id=GO:0019901
4	4	heat shock protein binding	GO:0031072	1.56×10-3	2.35×10-2	HDAC2|0.73;CDK1|0.69;DNAJA3|0.69	3	80	107	37689	http://www.ebi.ac.uk/QuickGO/GTerm?id=GO:0031072
5	5	oxidoreductase activity, acting on NAD(P)H, oxygen as acceptor	GO:0050664	1.78×10-3	2.54×10-2	AIFM1|0.74;CYBA|0.7	2	22	107	37689	http://www.ebi.ac.uk/QuickGO/GTerm?id=GO:0050664
5	5	collagen binding	GO:0005518	1.98×10-3	2.54×10-2	SERPINH1|0.72;CTSS|0.7;CD44|0.47	3	87	107	37689	http://www.ebi.ac.uk/QuickGO/GTerm?id=GO:0005518
4	4	nucleotide binding	GO:0000166	2.24×10-3	2.54×10-2	SLK|1.69;UBE2K|1.53;AIFM1|0.74;SMARCA4|0.74;DLD|0.73;SLTM|0.73;NARS2|0.72;DHX30|0.72;TUFM|0.71;KIF2A|0.71;NDUFA10|0.71;LSG1|0.7;SMARCA5|0.7;NDUFA13|0.7;CARS2|0.7;CDK1|0.69;DNAJA3|0.69;HNRNPR|0.69;HYOU1|0.69;CLPX|0.67;FUS|0.67;PARP1|0.66;ACAD9|0.64;MCCC2|0.64;LARS2|0.64;TOP2A|0.6;BMS1|0.54;EWSR1|0.53	28	5722	107	37689	http://www.ebi.ac.uk/QuickGO/GTerm?id=GO:0000166
4	4	nucleoside phosphate binding	GO:1901265	2.25×10-3	2.54×10-2	SLK|1.69;UBE2K|1.53;AIFM1|0.74;SMARCA4|0.74;DLD|0.73;SLTM|0.73;NARS2|0.72;DHX30|0.72;TUFM|0.71;KIF2A|0.71;NDUFA10|0.71;LSG1|0.7;SMARCA5|0.7;NDUFA13|0.7;CARS2|0.7;CDK1|0.69;DNAJA3|0.69;HNRNPR|0.69;HYOU1|0.69;CLPX|0.67;FUS|0.67;PARP1|0.66;ACAD9|0.64;MCCC2|0.64;LARS2|0.64;TOP2A|0.6;BMS1|0.54;EWSR1|0.53	28	5723	107	37689	http://www.ebi.ac.uk/QuickGO/GTerm?id=GO:1901265
4	4	protein dimerization activity	GO:0046983	2.42×10-3	2.54×10-2	SLK|1.69;CLIP1|1.66;S100A11|1.58;SRI|1.57;S100A6|1.52;AIFM1|0.74;HM13|0.71;CYBA|0.7;NUP210|0.69;TOP2A|0.6;HSD17B4|0.54	11	1423	107	37689	http://www.ebi.ac.uk/QuickGO/GTerm?id=GO:0046983
5	5	oxidoreductase activity, acting on the aldehyde or oxo group of donors, disulfide as acceptor	GO:0016624	2.48×10-3	2.54×10-2	PDHA1|0.74;PDHB|0.67	2	26	107	37689	http://www.ebi.ac.uk/QuickGO/GTerm?id=GO:0016624
4	4	protein N-terminus binding	GO:0047485	2.78×10-3	2.54×10-2	SMARCA4|0.74;PHB2|0.67;PARP1|0.66	3	98	107	37689	http://www.ebi.ac.uk/QuickGO/GTerm?id=GO:0047485
5	5	kinase binding	GO:0019900	2.80×10-3	2.54×10-2	CDKN2A|1.86;PPP1R12A|1.54;C1QBP|0.7;CSPG4|0.69;DNAJA3|0.69;PARP1|0.66;TOP2A|0.6	7	659	107	37689	http://www.ebi.ac.uk/QuickGO/GTerm?id=GO:0019900
5	5	methylmalonyl-CoA mutase activity	GO:0004494	2.84×10-3	2.54×10-2	MUT|0.74	1	1	107	37689	http://www.ebi.ac.uk/QuickGO/GTerm?id=GO:0004494
6	6	3alpha,7alpha,12alpha-trihydroxy-5beta-cholest-24-enoyl-CoA hydratase activity	GO:0033989	2.84×10-3	2.54×10-2	HSD17B4|0.54	1	1	107	37689	http://www.ebi.ac.uk/QuickGO/GTerm?id=GO:0033989
7	7	1-alkylglycerophosphocholine O-acyltransferase activity	GO:0047191	2.84×10-3	2.54×10-2	LPCAT1|0.74	1	1	107	37689	http://www.ebi.ac.uk/QuickGO/GTerm?id=GO:0047191
6	6	17-beta-hydroxysteroid dehydrogenase (NAD+) activity	GO:0044594	2.84×10-3	2.54×10-2	HSD17B4|0.54	1	1	107	37689	http://www.ebi.ac.uk/QuickGO/GTerm?id=GO:0044594
9	9	glucan 1,3-alpha-glucosidase activity	GO:0033919	2.84×10-3	2.54×10-2	GANAB|0.64	1	1	107	37689	http://www.ebi.ac.uk/QuickGO/GTerm?id=GO:0033919
7	7	phosphatidylglycerophosphatase activity	GO:0008962	2.84×10-3	2.54×10-2	PTPMT1|0.71	1	1	107	37689	http://www.ebi.ac.uk/QuickGO/GTerm?id=GO:0008962
6	6	malate dehydrogenase (NADP+) activity	GO:0046554	2.84×10-3	2.54×10-2	MDH2|0.68	1	1	107	37689	http://www.ebi.ac.uk/QuickGO/GTerm?id=GO:0046554
4	4	lipoamide binding	GO:0043544	2.84×10-3	2.54×10-2	DLD|0.73	1	1	107	37689	http://www.ebi.ac.uk/QuickGO/GTerm?id=GO:0043544
8	8	chloride-transporting ATPase activity	GO:0008555	2.84×10-3	2.54×10-2	PCYOX1|0.61	1	1	107	37689	http://www.ebi.ac.uk/QuickGO/GTerm?id=GO:0008555
8	8	alpha-1,3-glucosidase activity	GO:0090600	2.84×10-3	2.54×10-2	GANAB|0.64	1	1	107	37689	http://www.ebi.ac.uk/QuickGO/GTerm?id=GO:0090600
6	6	ornithine-oxo-acid transaminase activity	GO:0004587	2.84×10-3	2.54×10-2	OAT|0.73	1	1	107	37689	http://www.ebi.ac.uk/QuickGO/GTerm?id=GO:0004587
6	6	sulfur dioxygenase activity	GO:0050313	2.84×10-3	2.54×10-2	ETHE1|0.68	1	1	107	37689	http://www.ebi.ac.uk/QuickGO/GTerm?id=GO:0050313
6	6	peptide-aspartate beta-dioxygenase activity	GO:0004597	2.84×10-3	2.54×10-2	ASPH|0.63	1	1	107	37689	http://www.ebi.ac.uk/QuickGO/GTerm?id=GO:0004597
7	7	1-alkenylglycerophosphocholine O-acyltransferase activity	GO:0047159	2.84×10-3	2.54×10-2	LPCAT1|0.74	1	1	107	37689	http://www.ebi.ac.uk/QuickGO/GTerm?id=GO:0047159
9	9	ATPase activity, coupled	GO:0042623	3.59×10-3	3.15×10-2	ATP6V0D1|0.74;SMARCA4|0.74;DHX30|0.72;ATP1B1|0.69;TOP1|0.68;CLPX|0.67;PCYOX1|0.61;TOP2A|0.6	8	877	107	37689	http://www.ebi.ac.uk/QuickGO/GTerm?id=GO:0042623
3	3	hydrolase activity	GO:0016787	4.02×10-3	3.47×10-2	PSMA1|1.74;SRI|1.57;ATP6V0D1|0.74;APMAP|0.74;SMARCA4|0.74;ACP2|0.73;HDAC2|0.73;GNS|0.73;ATP5L|0.72;DHX30|0.72;GLS|0.72;TUFM|0.71;HM13|0.71;PTPMT1|0.71;KIF2A|0.71;LSG1|0.7;SMARCA5|0.7;CTSS|0.7;ATP1B1|0.69;PNPT1|0.69;USP39|0.69;TOP1|0.68;CLPX|0.67;GANAB|0.64;LARS2|0.64;NCEH1|0.63;PCYOX1|0.61;TOP2A|0.6;CD44|0.47	29	6245	107	37689	http://www.ebi.ac.uk/QuickGO/GTerm?id=GO:0016787
8	8	estrogen receptor binding	GO:0030331	4.22×10-3	3.58×10-2	PHB2|0.67;FUS|0.67	2	34	107	37689	http://www.ebi.ac.uk/QuickGO/GTerm?id=GO:0030331
7	7	nucleoside-triphosphatase activity	GO:0017111	4.90×10-3	4.03×10-2	ATP6V0D1|0.74;SMARCA4|0.74;ATP5L|0.72;DHX30|0.72;TUFM|0.71;KIF2A|0.71;LSG1|0.7;SMARCA5|0.7;ATP1B1|0.69;TOP1|0.68;CLPX|0.67;PCYOX1|0.61;TOP2A|0.6	13	2026	107	37689	http://www.ebi.ac.uk/QuickGO/GTerm?id=GO:0017111
4	4	DNA topoisomerase activity	GO:0003916	5.25×10-3	4.03×10-2	TOP1|0.68;TOP2A|0.6	2	38	107	37689	http://www.ebi.ac.uk/QuickGO/GTerm?id=GO:0003916
6	6	ATPase activity, coupled to transmembrane movement of ions	GO:0042625	5.62×10-3	4.03×10-2	ATP6V0D1|0.74;ATP1B1|0.69;PCYOX1|0.61	3	126	107	37689	http://www.ebi.ac.uk/QuickGO/GTerm?id=GO:0042625
5	5	amine-lyase activity	GO:0016843	5.67×10-3	4.03×10-2	APMAP|0.74	1	2	107	37689	http://www.ebi.ac.uk/QuickGO/GTerm?id=GO:0016843
6	6	strictosidine synthase activity	GO:0016844	5.67×10-3	4.03×10-2	APMAP|0.74	1	2	107	37689	http://www.ebi.ac.uk/QuickGO/GTerm?id=GO:0016844
6	6	long-chain-enoyl-CoA hydratase activity	GO:0016508	5.67×10-3	4.03×10-2	HSD17B4|0.54	1	2	107	37689	http://www.ebi.ac.uk/QuickGO/GTerm?id=GO:0016508
6	6	mitochondrial ribosome binding	GO:0097177	5.67×10-3	4.03×10-2	C1QBP|0.7	1	2	107	37689	http://www.ebi.ac.uk/QuickGO/GTerm?id=GO:0097177
7	7	L-phenylalanine transmembrane transporter activity	GO:0015192	5.67×10-3	4.03×10-2	SLC7A5|0.63	1	2	107	37689	http://www.ebi.ac.uk/QuickGO/GTerm?id=GO:0015192
6	6	interferon-gamma receptor binding	GO:0005133	5.67×10-3	4.03×10-2	DNAJA3|0.69	1	2	107	37689	http://www.ebi.ac.uk/QuickGO/GTerm?id=GO:0005133
6	6	methylcrotonoyl-CoA carboxylase activity	GO:0004485	5.67×10-3	4.03×10-2	MCCC2|0.64	1	2	107	37689	http://www.ebi.ac.uk/QuickGO/GTerm?id=GO:0004485
6	6	dihydrolipoyl dehydrogenase activity	GO:0004148	5.67×10-3	4.03×10-2	DLD|0.73	1	2	107	37689	http://www.ebi.ac.uk/QuickGO/GTerm?id=GO:0004148
6	6	nucleosomal DNA binding	GO:0031492	5.81×10-3	4.06×10-2	SMARCA4|0.74;HDAC2|0.73	2	40	107	37689	http://www.ebi.ac.uk/QuickGO/GTerm?id=GO:0031492
6	6	protein disulfide oxidoreductase activity	GO:0015035	6.38×10-3	4.41×10-2	ERO1L|0.58;GSTK1|0.56	2	42	107	37689	http://www.ebi.ac.uk/QuickGO/GTerm?id=GO:0015035
6	6	pyrophosphatase activity	GO:0016462	6.73×10-3	4.58×10-2	ATP6V0D1|0.74;SMARCA4|0.74;ATP5L|0.72;DHX30|0.72;TUFM|0.71;KIF2A|0.71;LSG1|0.7;SMARCA5|0.7;ATP1B1|0.69;TOP1|0.68;CLPX|0.67;PCYOX1|0.61;TOP2A|0.6	13	2106	107	37689	http://www.ebi.ac.uk/QuickGO/GTerm?id=GO:0016462
5	5	hydrolase activity, acting on acid anhydrides, in phosphorus-containing anhydrides	GO:0016818	7.15×10-3	4.80×10-2	ATP6V0D1|0.74;SMARCA4|0.74;ATP5L|0.72;DHX30|0.72;TUFM|0.71;KIF2A|0.71;LSG1|0.7;SMARCA5|0.7;ATP1B1|0.69;TOP1|0.68;CLPX|0.67;PCYOX1|0.61;TOP2A|0.6	13	2122	107	37689	http://www.ebi.ac.uk/QuickGO/GTerm?id=GO:0016818
4	4	hydrolase activity, acting on acid anhydrides	GO:0016817	7.45×10-3	4.87×10-2	ATP6V0D1|0.74;SMARCA4|0.74;ATP5L|0.72;DHX30|0.72;TUFM|0.71;KIF2A|0.71;LSG1|0.7;SMARCA5|0.7;ATP1B1|0.69;TOP1|0.68;CLPX|0.67;PCYOX1|0.61;TOP2A|0.6	13	2133	107	37689	http://www.ebi.ac.uk/QuickGO/GTerm?id=GO:0016817
5	5	protein homodimerization activity	GO:0042803	7.46×10-3	4.87×10-2	SLK|1.69;CLIP1|1.66;S100A11|1.58;S100A6|1.52;HM13|0.71;TOP2A|0.6;HSD17B4|0.54	7	791	107	37689	http://www.ebi.ac.uk/QuickGO/GTerm?id=GO:0042803
5	5	disulfide oxidoreductase activity	GO:0015036	8.27×10-3	5.00×10-2	ERO1L|0.58;GSTK1|0.56	2	48	107	37689	http://www.ebi.ac.uk/QuickGO/GTerm?id=GO:0015036
2	2	electron carrier activity	GO:0009055	8.43×10-3	5.00×10-2	AIFM1|0.74;CYBA|0.7;ASPH|0.63	3	146	107	37689	http://www.ebi.ac.uk/QuickGO/GTerm?id=GO:0009055
8	8	1-alkylglycerophosphocholine O-acetyltransferase activity	GO:0047192	8.49×10-3	5.00×10-2	LPCAT1|0.74	1	3	107	37689	http://www.ebi.ac.uk/QuickGO/GTerm?id=GO:0047192
7	7	L-tryptophan transmembrane transporter activity	GO:0015196	8.49×10-3	5.00×10-2	SLC7A5|0.63	1	3	107	37689	http://www.ebi.ac.uk/QuickGO/GTerm?id=GO:0015196
4	4	kininogen binding	GO:0030984	8.49×10-3	5.00×10-2	C1QBP|0.7	1	3	107	37689	http://www.ebi.ac.uk/QuickGO/GTerm?id=GO:0030984
6	6	citrate synthase activity	GO:0036440	8.49×10-3	5.00×10-2	CS|0.68	1	3	107	37689	http://www.ebi.ac.uk/QuickGO/GTerm?id=GO:0036440
7	7	citrate (Si)-synthase activity	GO:0004108	8.49×10-3	5.00×10-2	CS|0.68	1	3	107	37689	http://www.ebi.ac.uk/QuickGO/GTerm?id=GO:0004108
6	6	polyribonucleotide nucleotidyltransferase activity	GO:0004654	8.49×10-3	5.00×10-2	PNPT1|0.69	1	3	107	37689	http://www.ebi.ac.uk/QuickGO/GTerm?id=GO:0004654
6	6	ATP binding	GO:0005524	8.61×10-3	5.01×10-2	SLK|1.69;UBE2K|1.53;SMARCA4|0.74;NARS2|0.72;DHX30|0.72;KIF2A|0.71;NDUFA10|0.71;SMARCA5|0.7;NDUFA13|0.7;CARS2|0.7;CDK1|0.69;DNAJA3|0.69;HYOU1|0.69;CLPX|0.67;MCCC2|0.64;LARS2|0.64;TOP2A|0.6;BMS1|0.54	18	3463	107	37689	http://www.ebi.ac.uk/QuickGO/GTerm?id=GO:0005524
4	4	nucleic acid binding	GO:0003676	8.97×10-3	5.16×10-2	CDKN2A|1.86;GTF2F1|1.8;PSMA1|1.74;GIGYF2|1.72;SRRM1|1.69;CLIP1|1.66;ZNF598|1.6;MRPL21|0.74;AIFM1|0.74;SMARCA4|0.74;HDAC2|0.73;SLTM|0.73;MRPL54|0.72;NARS2|0.72;YBX3|0.72;SERPINH1|0.72;DHX30|0.72;TUFM|0.71;C1QBP|0.7;SMARCA5|0.7;PNPT1|0.69;HNRNPR|0.69;TOP1|0.68;POLDIP2|0.68;MDH2|0.68;CS|0.68;FUS|0.67;PARP1|0.66;GANAB|0.64;TMPO|0.61;TOP2A|0.6;BMS1|0.54;EWSR1|0.53;SSRP1|0.5	34	8124	107	37689	http://www.ebi.ac.uk/QuickGO/GTerm?id=GO:0003676
7	6,7	adenyl ribonucleotide binding	GO:0032559	9.56×10-3	5.43×10-2	SLK|1.69;UBE2K|1.53;SMARCA4|0.74;NARS2|0.72;DHX30|0.72;KIF2A|0.71;NDUFA10|0.71;SMARCA5|0.7;NDUFA13|0.7;CARS2|0.7;CDK1|0.69;DNAJA3|0.69;HYOU1|0.69;CLPX|0.67;MCCC2|0.64;LARS2|0.64;TOP2A|0.6;BMS1|0.54	18	3500	107	37689	http://www.ebi.ac.uk/QuickGO/GTerm?id=GO:0032559
6	6	adenyl nucleotide binding	GO:0030554	9.80×10-3	5.44×10-2	SLK|1.69;UBE2K|1.53;SMARCA4|0.74;NARS2|0.72;DHX30|0.72;KIF2A|0.71;NDUFA10|0.71;SMARCA5|0.7;NDUFA13|0.7;CARS2|0.7;CDK1|0.69;DNAJA3|0.69;HYOU1|0.69;CLPX|0.67;MCCC2|0.64;LARS2|0.64;TOP2A|0.6;BMS1|0.54	18	3509	107	37689	http://www.ebi.ac.uk/QuickGO/GTerm?id=GO:0030554
4	4	receptor binding	GO:0005102	9.89×10-3	5.44×10-2	SRI|1.57;SMARCA4|0.74;ALCAM|0.73;ITGA5|0.73;ECH1|0.72;C1QBP|0.7;DNAJA3|0.69;PHB2|0.67;FUS|0.67;ITGB4|0.65;GSTK1|0.56;HSD17B4|0.54	12	1964	107	37689	http://www.ebi.ac.uk/QuickGO/GTerm?id=GO:0005102
6	6	aminoacyl-tRNA ligase activity	GO:0004812	9.91×10-3	5.44×10-2	NARS2|0.72;CARS2|0.7;LARS2|0.64	3	155	107	37689	http://www.ebi.ac.uk/QuickGO/GTerm?id=GO:0004812
4	4	ligase activity, forming carbon-oxygen bonds	GO:0016875	1.04×10-2	5.60×10-2	NARS2|0.72;CARS2|0.7;LARS2|0.64	3	158	107	37689	http://www.ebi.ac.uk/QuickGO/GTerm?id=GO:0016875
5	5	ligase activity, forming aminoacyl-tRNA and related compounds	GO:0016876	1.04×10-2	5.60×10-2	NARS2|0.72;CARS2|0.7;LARS2|0.64	3	158	107	37689	http://www.ebi.ac.uk/QuickGO/GTerm?id=GO:0016876
3	3	carbohydrate derivative binding	GO:0097367	1.11×10-2	5.63×10-2	SLK|1.69;UBE2K|1.53;SMARCA4|0.74;NARS2|0.72;DHX30|0.72;TUFM|0.71;KIF2A|0.71;NDUFA10|0.71;C1QBP|0.7;LSG1|0.7;SMARCA5|0.7;CTSS|0.7;NDUFA13|0.7;CARS2|0.7;CDK1|0.69;DNAJA3|0.69;HYOU1|0.69;CLPX|0.67;MCCC2|0.64;LARS2|0.64;TOP2A|0.6;BMS1|0.54;CD44|0.47	23	4950	107	37689	http://www.ebi.ac.uk/QuickGO/GTerm?id=GO:0097367
7	7	protein kinase C binding	GO:0005080	1.11×10-2	5.63×10-2	C1QBP|0.7;TOP2A|0.6	2	56	107	37689	http://www.ebi.ac.uk/QuickGO/GTerm?id=GO:0005080
6	6	L-malate dehydrogenase activity	GO:0030060	1.13×10-2	5.63×10-2	MDH2|0.68	1	4	107	37689	http://www.ebi.ac.uk/QuickGO/GTerm?id=GO:0030060
10	8,10	citrate transmembrane transporter activity	GO:0015137	1.13×10-2	5.63×10-2	SLC25A1|0.74	1	4	107	37689	http://www.ebi.ac.uk/QuickGO/GTerm?id=GO:0015137
9	7,9	tricarboxylic acid transmembrane transporter activity	GO:0015142	1.13×10-2	5.63×10-2	SLC25A1|0.74	1	4	107	37689	http://www.ebi.ac.uk/QuickGO/GTerm?id=GO:0015142
8	8	poly(G) binding	GO:0034046	1.13×10-2	5.63×10-2	PNPT1|0.69	1	4	107	37689	http://www.ebi.ac.uk/QuickGO/GTerm?id=GO:0034046
8	8	aspartic endopeptidase activity, intramembrane cleaving	GO:0042500	1.13×10-2	5.63×10-2	HM13|0.71	1	4	107	37689	http://www.ebi.ac.uk/QuickGO/GTerm?id=GO:0042500
5	5	repressing transcription factor binding	GO:0070491	1.15×10-2	5.67×10-2	SRI|1.57;HDAC2|0.73	2	57	107	37689	http://www.ebi.ac.uk/QuickGO/GTerm?id=GO:0070491
6	6	nuclear hormone receptor binding	GO:0035257	1.25×10-2	6.10×10-2	SMARCA4|0.74;PHB2|0.67;FUS|0.67	3	169	107	37689	http://www.ebi.ac.uk/QuickGO/GTerm?id=GO:0035257
5	5	hyaluronic acid binding	GO:0005540	1.31×10-2	6.33×10-2	C1QBP|0.7;CD44|0.47	2	61	107	37689	http://www.ebi.ac.uk/QuickGO/GTerm?id=GO:0005540
4	4	calcium-dependent protein binding	GO:0048306	1.35×10-2	6.46×10-2	S100A11|1.58;S100A6|1.52	2	62	107	37689	http://www.ebi.ac.uk/QuickGO/GTerm?id=GO:0048306
7	7	1-acylglycerophosphocholine O-acyltransferase activity	GO:0047184	1.41×10-2	6.68×10-2	LPCAT1|0.74	1	5	107	37689	http://www.ebi.ac.uk/QuickGO/GTerm?id=GO:0047184
4	4	unfolded protein binding	GO:0051082	1.44×10-2	6.73×10-2	SERPINH1|0.72;DNAJA3|0.69;CLPX|0.67	3	178	107	37689	http://www.ebi.ac.uk/QuickGO/GTerm?id=GO:0051082
10	9,10	RNA polymerase II distal enhancer sequence-specific DNA binding	GO:0000980	1.48×10-2	6.87×10-2	SMARCA4|0.74;HDAC2|0.73	2	65	107	37689	http://www.ebi.ac.uk/QuickGO/GTerm?id=GO:0000980
10	8,10	neutral amino acid transmembrane transporter activity	GO:0015175	1.57×10-2	7.15×10-2	SLC7A5|0.63;SERINC1|0.62	2	67	107	37689	http://www.ebi.ac.uk/QuickGO/GTerm?id=GO:0015175
4	4	protein C-terminus binding	GO:0008022	1.57×10-2	7.15×10-2	DBNL|1.6;PHB2|0.67;TOP2A|0.6	3	184	107	37689	http://www.ebi.ac.uk/QuickGO/GTerm?id=GO:0008022
6	6	NADH dehydrogenase (quinone) activity	GO:0050136	1.66×10-2	7.36×10-2	NDUFA10|0.71;NDUFA13|0.7	2	69	107	37689	http://www.ebi.ac.uk/QuickGO/GTerm?id=GO:0050136
7	7	NADH dehydrogenase (ubiquinone) activity	GO:0008137	1.66×10-2	7.36×10-2	NDUFA10|0.71;NDUFA13|0.7	2	69	107	37689	http://www.ebi.ac.uk/QuickGO/GTerm?id=GO:0008137
7	7	vascular endothelial growth factor receptor 2 binding	GO:0043184	1.69×10-2	7.36×10-2	ITGA5|0.73	1	6	107	37689	http://www.ebi.ac.uk/QuickGO/GTerm?id=GO:0043184
7	7	leucine-tRNA ligase activity	GO:0004823	1.69×10-2	7.36×10-2	LARS2|0.64	1	6	107	37689	http://www.ebi.ac.uk/QuickGO/GTerm?id=GO:0004823
7	7	alpha-glucosidase activity	GO:0090599	1.69×10-2	7.36×10-2	GANAB|0.64	1	6	107	37689	http://www.ebi.ac.uk/QuickGO/GTerm?id=GO:0090599
5	5	flavin adenine dinucleotide binding	GO:0050660	1.75×10-2	7.57×10-2	AIFM1|0.74;DLD|0.73;ACAD9|0.64	3	192	107	37689	http://www.ebi.ac.uk/QuickGO/GTerm?id=GO:0050660
5	5	transcription coactivator activity	GO:0003713	1.84×10-2	7.85×10-2	GTF2F1|1.8;SMARCA4|0.74;TRRAP|0.72;FUS|0.67	4	353	107	37689	http://www.ebi.ac.uk/QuickGO/GTerm?id=GO:0003713
10	10	DNA-dependent ATPase activity	GO:0008094	1.88×10-2	7.95×10-2	SMARCA4|0.74;TOP1|0.68;TOP2A|0.6	3	197	107	37689	http://www.ebi.ac.uk/QuickGO/GTerm?id=GO:0008094
5	5	Tat protein binding	GO:0030957	1.97×10-2	8.07×10-2	SMARCA4|0.74	1	7	107	37689	http://www.ebi.ac.uk/QuickGO/GTerm?id=GO:0030957
6	6	N-acetylglucosamine-6-sulfatase activity	GO:0008449	1.97×10-2	8.07×10-2	GNS|0.73	1	7	107	37689	http://www.ebi.ac.uk/QuickGO/GTerm?id=GO:0008449
7	7	O-acetyltransferase activity	GO:0016413	1.97×10-2	8.07×10-2	LPCAT1|0.74	1	7	107	37689	http://www.ebi.ac.uk/QuickGO/GTerm?id=GO:0016413
5	5	complement component C1q binding	GO:0001849	1.97×10-2	8.07×10-2	C1QBP|0.7	1	7	107	37689	http://www.ebi.ac.uk/QuickGO/GTerm?id=GO:0001849
4	4	transcription cofactor activity	GO:0003712	2.00×10-2	8.14×10-2	GTF2F1|1.8;SMARCA4|0.74;YBX3|0.72;TRRAP|0.72;C1QBP|0.7;FUS|0.67	6	748	107	37689	http://www.ebi.ac.uk/QuickGO/GTerm?id=GO:0003712
5	5	purine ribonucleoside triphosphate binding	GO:0035639	2.17×10-2	8.55×10-2	SLK|1.69;UBE2K|1.53;SMARCA4|0.74;NARS2|0.72;DHX30|0.72;TUFM|0.71;KIF2A|0.71;NDUFA10|0.71;LSG1|0.7;SMARCA5|0.7;NDUFA13|0.7;CARS2|0.7;CDK1|0.69;DNAJA3|0.69;HYOU1|0.69;CLPX|0.67;MCCC2|0.64;LARS2|0.64;TOP2A|0.6;BMS1|0.54	20	4388	107	37689	http://www.ebi.ac.uk/QuickGO/GTerm?id=GO:0035639
6	6	purine ribonucleoside binding	GO:0032550	2.22×10-2	8.55×10-2	SLK|1.69;UBE2K|1.53;SMARCA4|0.74;NARS2|0.72;DHX30|0.72;TUFM|0.71;KIF2A|0.71;NDUFA10|0.71;LSG1|0.7;SMARCA5|0.7;NDUFA13|0.7;CARS2|0.7;CDK1|0.69;DNAJA3|0.69;HYOU1|0.69;CLPX|0.67;MCCC2|0.64;LARS2|0.64;TOP2A|0.6;BMS1|0.54	20	4399	107	37689	http://www.ebi.ac.uk/QuickGO/GTerm?id=GO:0032550
8	8	enhancer sequence-specific DNA binding	GO:0001158	2.24×10-2	8.55×10-2	SMARCA4|0.74;HDAC2|0.73	2	81	107	37689	http://www.ebi.ac.uk/QuickGO/GTerm?id=GO:0001158
5	5	purine nucleoside binding	GO:0001883	2.24×10-2	8.55×10-2	SLK|1.69;UBE2K|1.53;SMARCA4|0.74;NARS2|0.72;DHX30|0.72;TUFM|0.71;KIF2A|0.71;NDUFA10|0.71;LSG1|0.7;SMARCA5|0.7;NDUFA13|0.7;CARS2|0.7;CDK1|0.69;DNAJA3|0.69;HYOU1|0.69;CLPX|0.67;MCCC2|0.64;LARS2|0.64;TOP2A|0.6;BMS1|0.54	20	4402	107	37689	http://www.ebi.ac.uk/QuickGO/GTerm?id=GO:0001883
6	6	prenylcysteine oxidase activity	GO:0001735	2.25×10-2	8.55×10-2	PCYOX1|0.61	1	8	107	37689	http://www.ebi.ac.uk/QuickGO/GTerm?id=GO:0001735
5	5	DNA polymerase binding	GO:0070182	2.25×10-2	8.55×10-2	SMARCA4|0.74	1	8	107	37689	http://www.ebi.ac.uk/QuickGO/GTerm?id=GO:0070182
9	8,9	hydrogen-exporting ATPase activity, phosphorylative mechanism	GO:0008553	2.25×10-2	8.55×10-2	ATP6V0D1|0.74	1	8	107	37689	http://www.ebi.ac.uk/QuickGO/GTerm?id=GO:0008553
6	6	NAD(P)H oxidase activity	GO:0016174	2.25×10-2	8.55×10-2	AIFM1|0.74	1	8	107	37689	http://www.ebi.ac.uk/QuickGO/GTerm?id=GO:0016174
5	5	carboxylic ester hydrolase activity	GO:0052689	2.30×10-2	8.66×10-2	APMAP|0.74;LARS2|0.64;NCEH1|0.63	3	213	107	37689	http://www.ebi.ac.uk/QuickGO/GTerm?id=GO:0052689
5	5	ribonucleoside binding	GO:0032549	2.31×10-2	8.66×10-2	SLK|1.69;UBE2K|1.53;SMARCA4|0.74;NARS2|0.72;DHX30|0.72;TUFM|0.71;KIF2A|0.71;NDUFA10|0.71;LSG1|0.7;SMARCA5|0.7;NDUFA13|0.7;CARS2|0.7;CDK1|0.69;DNAJA3|0.69;HYOU1|0.69;CLPX|0.67;MCCC2|0.64;LARS2|0.64;TOP2A|0.6;BMS1|0.54	20	4417	107	37689	http://www.ebi.ac.uk/QuickGO/GTerm?id=GO:0032549
5	5	oxidoreductase activity, acting on NAD(P)H, quinone or similar compound as acceptor	GO:0016655	2.34×10-2	8.70×10-2	NDUFA10|0.71;NDUFA13|0.7	2	83	107	37689	http://www.ebi.ac.uk/QuickGO/GTerm?id=GO:0016655
4	4	nucleoside binding	GO:0001882	2.38×10-2	8.77×10-2	SLK|1.69;UBE2K|1.53;SMARCA4|0.74;NARS2|0.72;DHX30|0.72;TUFM|0.71;KIF2A|0.71;NDUFA10|0.71;LSG1|0.7;SMARCA5|0.7;NDUFA13|0.7;CARS2|0.7;CDK1|0.69;DNAJA3|0.69;HYOU1|0.69;CLPX|0.67;MCCC2|0.64;LARS2|0.64;TOP2A|0.6;BMS1|0.54	20	4430	107	37689	http://www.ebi.ac.uk/QuickGO/GTerm?id=GO:0001882
6	5,6	purine ribonucleotide binding	GO:0032555	2.40×10-2	8.78×10-2	SLK|1.69;UBE2K|1.53;SMARCA4|0.74;NARS2|0.72;DHX30|0.72;TUFM|0.71;KIF2A|0.71;NDUFA10|0.71;LSG1|0.7;SMARCA5|0.7;NDUFA13|0.7;CARS2|0.7;CDK1|0.69;DNAJA3|0.69;HYOU1|0.69;CLPX|0.67;MCCC2|0.64;LARS2|0.64;TOP2A|0.6;BMS1|0.54	20	4434	107	37689	http://www.ebi.ac.uk/QuickGO/GTerm?id=GO:0032555
7	5,7	chromatin DNA binding	GO:0031490	2.50×10-2	8.94×10-2	SMARCA4|0.74;HDAC2|0.73	2	86	107	37689	http://www.ebi.ac.uk/QuickGO/GTerm?id=GO:0031490
7	7	cysteine-tRNA ligase activity	GO:0004817	2.53×10-2	8.94×10-2	CARS2|0.7	1	9	107	37689	http://www.ebi.ac.uk/QuickGO/GTerm?id=GO:0004817
10	8,10	aromatic amino acid transmembrane transporter activity	GO:0015173	2.53×10-2	8.94×10-2	SLC7A5|0.63	1	9	107	37689	http://www.ebi.ac.uk/QuickGO/GTerm?id=GO:0015173
7	7	asparagine-tRNA ligase activity	GO:0004816	2.53×10-2	8.94×10-2	NARS2|0.72	1	9	107	37689	http://www.ebi.ac.uk/QuickGO/GTerm?id=GO:0004816
5	5	purine nucleotide binding	GO:0017076	2.54×10-2	8.94×10-2	SLK|1.69;UBE2K|1.53;SMARCA4|0.74;NARS2|0.72;DHX30|0.72;TUFM|0.71;KIF2A|0.71;NDUFA10|0.71;LSG1|0.7;SMARCA5|0.7;NDUFA13|0.7;CARS2|0.7;CDK1|0.69;DNAJA3|0.69;HYOU1|0.69;CLPX|0.67;MCCC2|0.64;LARS2|0.64;TOP2A|0.6;BMS1|0.54	20	4460	107	37689	http://www.ebi.ac.uk/QuickGO/GTerm?id=GO:0017076
4	4	ribonucleotide binding	GO:0032553	2.61×10-2	9.12×10-2	SLK|1.69;UBE2K|1.53;SMARCA4|0.74;NARS2|0.72;DHX30|0.72;TUFM|0.71;KIF2A|0.71;NDUFA10|0.71;LSG1|0.7;SMARCA5|0.7;NDUFA13|0.7;CARS2|0.7;CDK1|0.69;DNAJA3|0.69;HYOU1|0.69;CLPX|0.67;MCCC2|0.64;LARS2|0.64;TOP2A|0.6;BMS1|0.54	20	4473	107	37689	http://www.ebi.ac.uk/QuickGO/GTerm?id=GO:0032553
3	3	transcription factor activity, transcription factor binding	GO:0000989	2.65×10-2	9.20×10-2	GTF2F1|1.8;SMARCA4|0.74;YBX3|0.72;TRRAP|0.72;C1QBP|0.7;FUS|0.67	6	798	107	37689	http://www.ebi.ac.uk/QuickGO/GTerm?id=GO:0000989
5	5	hormone receptor binding	GO:0051427	2.68×10-2	9.24×10-2	SMARCA4|0.74;PHB2|0.67;FUS|0.67	3	226	107	37689	http://www.ebi.ac.uk/QuickGO/GTerm?id=GO:0051427
2	2	transcription factor activity, protein binding	GO:0000988	2.70×10-2	9.26×10-2	GTF2F1|1.8;SMARCA4|0.74;YBX3|0.72;TRRAP|0.72;C1QBP|0.7;FUS|0.67	6	802	107	37689	http://www.ebi.ac.uk/QuickGO/GTerm?id=GO:0000988
6	6	arylesterase activity	GO:0004064	2.80×10-2	9.47×10-2	APMAP|0.74	1	10	107	37689	http://www.ebi.ac.uk/QuickGO/GTerm?id=GO:0004064
6	6	vascular endothelial growth factor receptor binding	GO:0005172	2.80×10-2	9.47×10-2	ITGA5|0.73	1	10	107	37689	http://www.ebi.ac.uk/QuickGO/GTerm?id=GO:0005172
5	5	NADH dehydrogenase activity	GO:0003954	2.83×10-2	9.50×10-2	NDUFA10|0.71;NDUFA13|0.7	2	92	107	37689	http://www.ebi.ac.uk/QuickGO/GTerm?id=GO:0003954
8	8	enhancer binding	GO:0035326	2.95×10-2	9.81×10-2	SMARCA4|0.74;HDAC2|0.73	2	94	107	37689	http://www.ebi.ac.uk/QuickGO/GTerm?id=GO:0035326
3	3	cofactor binding	GO:0048037	3.04×10-2	9.92×10-2	AIFM1|0.74;OAT|0.73;DLD|0.73;PARP1|0.66;ACAD9|0.64	5	611	107	37689	http://www.ebi.ac.uk/QuickGO/GTerm?id=GO:0048037
11	7,9,11	L-leucine transmembrane transporter activity	GO:0015190	3.08×10-2	9.92×10-2	SLC7A5|0.63	1	11	107	37689	http://www.ebi.ac.uk/QuickGO/GTerm?id=GO:0015190
9	9	phosphatidylinositol-4,5-bisphosphate 5-phosphatase activity	GO:0004439	3.08×10-2	9.92×10-2	PTPMT1|0.71	1	11	107	37689	http://www.ebi.ac.uk/QuickGO/GTerm?id=GO:0004439
10	8,10	branched-chain amino acid transmembrane transporter activity	GO:0015658	3.08×10-2	9.92×10-2	SLC7A5|0.63	1	11	107	37689	http://www.ebi.ac.uk/QuickGO/GTerm?id=GO:0015658
5	5	CoA carboxylase activity	GO:0016421	3.08×10-2	9.92×10-2	MCCC2|0.64	1	11	107	37689	http://www.ebi.ac.uk/QuickGO/GTerm?id=GO:0016421
4	4	ion channel binding	GO:0044325	3.18×10-2	1.02×10-1	SRI|1.57;ASPH|0.63	2	98	107	37689	http://www.ebi.ac.uk/QuickGO/GTerm?id=GO:0044325
4	4	ligase activity, forming carbon-carbon bonds	GO:0016885	3.35×10-2	1.05×10-1	MCCC2|0.64	1	12	107	37689	http://www.ebi.ac.uk/QuickGO/GTerm?id=GO:0016885
6	6	3-hydroxyacyl-CoA dehydrogenase activity	GO:0003857	3.35×10-2	1.05×10-1	HSD17B4|0.54	1	12	107	37689	http://www.ebi.ac.uk/QuickGO/GTerm?id=GO:0003857
4	4	opsonin binding	GO:0001846	3.35×10-2	1.05×10-1	C1QBP|0.7	1	12	107	37689	http://www.ebi.ac.uk/QuickGO/GTerm?id=GO:0001846
5	5	cobalamin binding	GO:0031419	3.35×10-2	1.05×10-1	MUT|0.74	1	12	107	37689	http://www.ebi.ac.uk/QuickGO/GTerm?id=GO:0031419
4	4	chaperone binding	GO:0051087	3.61×10-2	1.10×10-1	DNAJA3|0.69;HYOU1|0.69	2	105	107	37689	http://www.ebi.ac.uk/QuickGO/GTerm?id=GO:0051087
8	8	poly(U) RNA binding	GO:0008266	3.63×10-2	1.10×10-1	PNPT1|0.69	1	13	107	37689	http://www.ebi.ac.uk/QuickGO/GTerm?id=GO:0008266
8	8	NAD-dependent histone deacetylase activity (H3-K14 specific)	GO:0032041	3.63×10-2	1.10×10-1	HDAC2|0.73	1	13	107	37689	http://www.ebi.ac.uk/QuickGO/GTerm?id=GO:0032041
7	7	histone deacetylase activity (H3-K14 specific)	GO:0031078	3.63×10-2	1.10×10-1	HDAC2|0.73	1	13	107	37689	http://www.ebi.ac.uk/QuickGO/GTerm?id=GO:0031078
6	6	glucosidase activity	GO:0015926	3.90×10-2	1.14×10-1	GANAB|0.64	1	14	107	37689	http://www.ebi.ac.uk/QuickGO/GTerm?id=GO:0015926
7	7	ubiquitin-ubiquitin ligase activity	GO:0034450	3.90×10-2	1.14×10-1	UBE2K|1.53	1	14	107	37689	http://www.ebi.ac.uk/QuickGO/GTerm?id=GO:0034450
4	4	lamin binding	GO:0005521	3.90×10-2	1.14×10-1	TMPO|0.61	1	14	107	37689	http://www.ebi.ac.uk/QuickGO/GTerm?id=GO:0005521
6	6	miRNA binding	GO:0035198	3.90×10-2	1.14×10-1	PNPT1|0.69	1	14	107	37689	http://www.ebi.ac.uk/QuickGO/GTerm?id=GO:0035198
6	6	microtubule plus-end binding	GO:0051010	3.90×10-2	1.14×10-1	CLIP1|1.66	1	14	107	37689	http://www.ebi.ac.uk/QuickGO/GTerm?id=GO:0051010
10	9,10	sodium:potassium-exchanging ATPase activity	GO:0005391	3.90×10-2	1.14×10-1	ATP1B1|0.69	1	14	107	37689	http://www.ebi.ac.uk/QuickGO/GTerm?id=GO:0005391
4	4	coenzyme binding	GO:0050662	3.91×10-2	1.14×10-1	AIFM1|0.74;DLD|0.73;PARP1|0.66;ACAD9|0.64	4	448	107	37689	http://www.ebi.ac.uk/QuickGO/GTerm?id=GO:0050662
4	4	anion binding	GO:0043168	3.99×10-2	1.15×10-1	SLK|1.69;UBE2K|1.53;AIFM1|0.74;SMARCA4|0.74;OAT|0.73;DLD|0.73;NARS2|0.72;DHX30|0.72;TUFM|0.71;KIF2A|0.71;NDUFA10|0.71;LSG1|0.7;SMARCA5|0.7;NDUFA13|0.7;CARS2|0.7;CDK1|0.69;DNAJA3|0.69;HYOU1|0.69;CLPX|0.67;ACAD9|0.64;MCCC2|0.64;LARS2|0.64;TOP2A|0.6;BMS1|0.54	24	5889	107	37689	http://www.ebi.ac.uk/QuickGO/GTerm?id=GO:0043168
7	7	poly-pyrimidine tract binding	GO:0008187	4.18×10-2	1.18×10-1	PNPT1|0.69	1	15	107	37689	http://www.ebi.ac.uk/QuickGO/GTerm?id=GO:0008187
8	8	potassium-transporting ATPase activity	GO:0008556	4.18×10-2	1.18×10-1	ATP1B1|0.69	1	15	107	37689	http://www.ebi.ac.uk/QuickGO/GTerm?id=GO:0008556
8	8	phosphatidylinositol phosphate 5-phosphatase activity	GO:0034595	4.18×10-2	1.18×10-1	PTPMT1|0.71	1	15	107	37689	http://www.ebi.ac.uk/QuickGO/GTerm?id=GO:0034595
6	6	superoxide-generating NADPH oxidase activity	GO:0016175	4.18×10-2	1.18×10-1	CYBA|0.7	1	15	107	37689	http://www.ebi.ac.uk/QuickGO/GTerm?id=GO:0016175
11	5,11	ATPase activity, coupled to transmembrane movement of substances	GO:0042626	4.19×10-2	1.18×10-1	ATP6V0D1|0.74;ATP1B1|0.69;PCYOX1|0.61	3	270	107	37689	http://www.ebi.ac.uk/QuickGO/GTerm?id=GO:0042626
8	8	RNA polymerase II carboxy-terminal domain kinase activity	GO:0008353	4.45×10-2	1.21×10-1	CDK1|0.69	1	16	107	37689	http://www.ebi.ac.uk/QuickGO/GTerm?id=GO:0008353
5	5	oxidoreductase activity, acting on a sulfur group of donors, oxygen as acceptor	GO:0016670	4.45×10-2	1.21×10-1	PCYOX1|0.61	1	16	107	37689	http://www.ebi.ac.uk/QuickGO/GTerm?id=GO:0016670
10	8,10	L-amino acid transmembrane transporter activity	GO:0015179	4.45×10-2	1.21×10-1	SLC7A5|0.63;SERINC1|0.62	2	118	107	37689	http://www.ebi.ac.uk/QuickGO/GTerm?id=GO:0015179
4	4	hydrolase activity, acting on acid anhydrides, catalyzing transmembrane movement of substances	GO:0016820	4.46×10-2	1.21×10-1	ATP6V0D1|0.74;ATP1B1|0.69;PCYOX1|0.61	3	277	107	37689	http://www.ebi.ac.uk/QuickGO/GTerm?id=GO:0016820
5	5	primary active transmembrane transporter activity	GO:0015399	4.50×10-2	1.21×10-1	ATP6V0D1|0.74;ATP1B1|0.69;PCYOX1|0.61	3	278	107	37689	http://www.ebi.ac.uk/QuickGO/GTerm?id=GO:0015399
6	6	P-P-bond-hydrolysis-driven transmembrane transporter activity	GO:0015405	4.50×10-2	1.21×10-1	ATP6V0D1|0.74;ATP1B1|0.69;PCYOX1|0.61	3	278	107	37689	http://www.ebi.ac.uk/QuickGO/GTerm?id=GO:0015405
5	5	NAD binding	GO:0051287	4.52×10-2	1.21×10-1	DLD|0.73;PARP1|0.66	2	119	107	37689	http://www.ebi.ac.uk/QuickGO/GTerm?id=GO:0051287
5	5	tubulin binding	GO:0015631	4.53×10-2	1.21×10-1	NDRG1|1.88;STMN1|1.67;CLIP1|1.66;KIF2A|0.71	4	470	107	37689	http://www.ebi.ac.uk/QuickGO/GTerm?id=GO:0015631
6	6	platelet-derived growth factor receptor binding	GO:0005161	4.72×10-2	1.22×10-1	ITGA5|0.73	1	17	107	37689	http://www.ebi.ac.uk/QuickGO/GTerm?id=GO:0005161
5	5	lysine-acetylated histone binding	GO:0070577	4.72×10-2	1.22×10-1	SMARCA4|0.74	1	17	107	37689	http://www.ebi.ac.uk/QuickGO/GTerm?id=GO:0070577
6	6	glutaminase activity	GO:0004359	4.72×10-2	1.22×10-1	GLS|0.72	1	17	107	37689	http://www.ebi.ac.uk/QuickGO/GTerm?id=GO:0004359
6	5,6	MHC class II protein complex binding	GO:0023026	4.72×10-2	1.22×10-1	ATP1B1|0.69	1	17	107	37689	http://www.ebi.ac.uk/QuickGO/GTerm?id=GO:0023026
6	6	retinoid X receptor binding	GO:0046965	4.72×10-2	1.22×10-1	FUS|0.67	1	17	107	37689	http://www.ebi.ac.uk/QuickGO/GTerm?id=GO:0046965
7	7	NAD-dependent histone deacetylase activity	GO:0017136	4.72×10-2	1.22×10-1	HDAC2|0.73	1	17	107	37689	http://www.ebi.ac.uk/QuickGO/GTerm?id=GO:0017136
6	6	myosin V binding	GO:0031489	4.72×10-2	1.22×10-1	FUS|0.67	1	17	107	37689	http://www.ebi.ac.uk/QuickGO/GTerm?id=GO:0031489
5	5	transcription corepressor activity	GO:0003714	4.74×10-2	1.22×10-1	SMARCA4|0.74;YBX3|0.72;C1QBP|0.7	3	284	107	37689	http://www.ebi.ac.uk/QuickGO/GTerm?id=GO:0003714
7	7	cation-transporting ATPase activity	GO:0019829	4.94×10-2	1.25×10-1	ATP6V0D1|0.74;ATP1B1|0.69	2	125	107	37689	http://www.ebi.ac.uk/QuickGO/GTerm?id=GO:0019829
8	6,8	carboxylic acid transmembrane transporter activity	GO:0046943	4.95×10-2	1.25×10-1	SLC25A1|0.74;SLC7A5|0.63;SERINC1|0.62	3	289	107	37689	http://www.ebi.ac.uk/QuickGO/GTerm?id=GO:0046943
6	6	NAD-dependent protein deacetylase activity	GO:0034979	4.99×10-2	1.25×10-1	HDAC2|0.73	1	18	107	37689	http://www.ebi.ac.uk/QuickGO/GTerm?id=GO:0034979
6	6	FAD binding	GO:0071949	4.99×10-2	1.25×10-1	AIFM1|0.74	1	18	107	37689	http://www.ebi.ac.uk/QuickGO/GTerm?id=GO:0071949
4	4	oxidoreductase activity, acting on the aldehyde or oxo group of donors	GO:0016903	5.01×10-2	1.25×10-1	PDHA1|0.74;PDHB|0.67	2	126	107	37689	http://www.ebi.ac.uk/QuickGO/GTerm?id=GO:0016903
5	5	organic acid transmembrane transporter activity	GO:0005342	5.16×10-2	1.28×10-1	SLC25A1|0.74;SLC7A5|0.63;SERINC1|0.62	3	294	107	37689	http://www.ebi.ac.uk/QuickGO/GTerm?id=GO:0005342
6	6	phosphotyrosine binding	GO:0001784	5.26×10-2	1.29×10-1	ACP2|0.73	1	19	107	37689	http://www.ebi.ac.uk/QuickGO/GTerm?id=GO:0001784
6	6	aminoacyl-tRNA editing activity	GO:0002161	5.26×10-2	1.29×10-1	LARS2|0.64	1	19	107	37689	http://www.ebi.ac.uk/QuickGO/GTerm?id=GO:0002161
4	4	14-3-3 protein binding	GO:0071889	5.26×10-2	1.29×10-1	PPP1R12A|1.54	1	19	107	37689	http://www.ebi.ac.uk/QuickGO/GTerm?id=GO:0071889
7	7	hyalurononglucosaminidase activity	GO:0004415	5.53×10-2	1.32×10-1	CD44|0.47	1	20	107	37689	http://www.ebi.ac.uk/QuickGO/GTerm?id=GO:0004415
5	5	ATPase activator activity	GO:0001671	5.53×10-2	1.32×10-1	ATP1B1|0.69	1	20	107	37689	http://www.ebi.ac.uk/QuickGO/GTerm?id=GO:0001671
5	5	malate dehydrogenase activity	GO:0016615	5.53×10-2	1.32×10-1	MDH2|0.68	1	20	107	37689	http://www.ebi.ac.uk/QuickGO/GTerm?id=GO:0016615
7	7	cyclin-dependent protein serine/threonine kinase inhibitor activity	GO:0004861	5.53×10-2	1.32×10-1	CDKN2A|1.86	1	20	107	37689	http://www.ebi.ac.uk/QuickGO/GTerm?id=GO:0004861
5	4,5	MHC protein complex binding	GO:0023023	5.53×10-2	1.32×10-1	ATP1B1|0.69	1	20	107	37689	http://www.ebi.ac.uk/QuickGO/GTerm?id=GO:0023023
3	3	drug binding	GO:0008144	5.66×10-2	1.35×10-1	FKBP10|0.73;TOP2A|0.6	2	135	107	37689	http://www.ebi.ac.uk/QuickGO/GTerm?id=GO:0008144
4	4	dioxygenase activity	GO:0051213	5.73×10-2	1.36×10-1	ETHE1|0.68;ASPH|0.63	2	136	107	37689	http://www.ebi.ac.uk/QuickGO/GTerm?id=GO:0051213
5	5	R-SMAD binding	GO:0070412	5.80×10-2	1.36×10-1	PARP1|0.66	1	21	107	37689	http://www.ebi.ac.uk/QuickGO/GTerm?id=GO:0070412
5	5	Hsp70 protein binding	GO:0030544	5.80×10-2	1.36×10-1	CDK1|0.69	1	21	107	37689	http://www.ebi.ac.uk/QuickGO/GTerm?id=GO:0030544
6	6	DNA binding, bending	GO:0008301	6.06×10-2	1.41×10-1	TOP2A|0.6	1	22	107	37689	http://www.ebi.ac.uk/QuickGO/GTerm?id=GO:0008301
4	4	tetrapyrrole binding	GO:0046906	6.09×10-2	1.41×10-1	MUT|0.74;CYBA|0.7;CYB5B|0.69	3	315	107	37689	http://www.ebi.ac.uk/QuickGO/GTerm?id=GO:0046906
8	8	core promoter binding	GO:0001047	6.26×10-2	1.45×10-1	HDAC2|0.73;TOP1|0.68	2	143	107	37689	http://www.ebi.ac.uk/QuickGO/GTerm?id=GO:0001047
4	4	complement binding	GO:0001848	6.33×10-2	1.46×10-1	C1QBP|0.7	1	23	107	37689	http://www.ebi.ac.uk/QuickGO/GTerm?id=GO:0001848
3	3	enzyme regulator activity	GO:0030234	6.38×10-2	1.46×10-1	CDKN2A|1.86;GTF2F1|1.8;DBNL|1.6;PPP1R12A|1.54;SERPINH1|0.72;ATP1B1|0.69;DNAJA3|0.69;CLPX|0.67	8	1500	107	37689	http://www.ebi.ac.uk/QuickGO/GTerm?id=GO:0030234
5	5	hydrolase activity, acting on carbon-nitrogen (but not peptide) bonds, in linear amides	GO:0016811	6.49×10-2	1.47×10-1	HDAC2|0.73;GLS|0.72	2	146	107	37689	http://www.ebi.ac.uk/QuickGO/GTerm?id=GO:0016811
4	4	oxidoreductase activity, acting on the CH-CH group of donors	GO:0016627	6.57×10-2	1.47×10-1	TECR|0.74;ACAD9|0.64	2	147	107	37689	http://www.ebi.ac.uk/QuickGO/GTerm?id=GO:0016627
5	5	tropomyosin binding	GO:0005523	6.60×10-2	1.47×10-1	S100A6|1.52	1	24	107	37689	http://www.ebi.ac.uk/QuickGO/GTerm?id=GO:0005523
6	6	ATP-dependent peptidase activity	GO:0004176	6.60×10-2	1.47×10-1	CLPX|0.67	1	24	107	37689	http://www.ebi.ac.uk/QuickGO/GTerm?id=GO:0004176
12	8,10,12	L-serine transmembrane transporter activity	GO:0015194	6.60×10-2	1.47×10-1	SERINC1|0.62	1	24	107	37689	http://www.ebi.ac.uk/QuickGO/GTerm?id=GO:0015194
5	5	transferase activity, transferring acyl groups, acyl groups converted into alkyl on transfer	GO:0046912	6.60×10-2	1.47×10-1	CS|0.68	1	24	107	37689	http://www.ebi.ac.uk/QuickGO/GTerm?id=GO:0046912
5	5	mannose binding	GO:0005537	6.86×10-2	1.51×10-1	BSG|0.73	1	25	107	37689	http://www.ebi.ac.uk/QuickGO/GTerm?id=GO:0005537
5	5	phosphatase activator activity	GO:0019211	6.86×10-2	1.51×10-1	GTF2F1|1.8	1	25	107	37689	http://www.ebi.ac.uk/QuickGO/GTerm?id=GO:0019211
10	10	ATPase activity, coupled to movement of substances	GO:0043492	7.09×10-2	1.54×10-1	ATP6V0D1|0.74;ATP1B1|0.69;PCYOX1|0.61	3	336	107	37689	http://www.ebi.ac.uk/QuickGO/GTerm?id=GO:0043492
3	3	ligase activity	GO:0016874	7.11×10-2	1.54×10-1	UBE2K|1.53;NARS2|0.72;CARS2|0.7;MCCC2|0.64;LARS2|0.64	5	778	107	37689	http://www.ebi.ac.uk/QuickGO/GTerm?id=GO:0016874
5	5	protein phosphorylated amino acid binding	GO:0045309	7.13×10-2	1.54×10-1	ACP2|0.73	1	26	107	37689	http://www.ebi.ac.uk/QuickGO/GTerm?id=GO:0045309
11	7,9,11	serine transmembrane transporter activity	GO:0022889	7.13×10-2	1.54×10-1	SERINC1|0.62	1	26	107	37689	http://www.ebi.ac.uk/QuickGO/GTerm?id=GO:0022889
6	6	RNA polymerase II repressing transcription factor binding	GO:0001103	7.39×10-2	1.59×10-1	HDAC2|0.73	1	27	107	37689	http://www.ebi.ac.uk/QuickGO/GTerm?id=GO:0001103
7	7	organic anion transmembrane transporter activity	GO:0008514	7.55×10-2	1.62×10-1	SLC25A1|0.74;SLC7A5|0.63;SERINC1|0.62	3	345	107	37689	http://www.ebi.ac.uk/QuickGO/GTerm?id=GO:0008514
6	6	RNA polymerase II transcription coactivator activity	GO:0001105	7.65×10-2	1.64×10-1	SMARCA4|0.74	1	28	107	37689	http://www.ebi.ac.uk/QuickGO/GTerm?id=GO:0001105
4	4	cytoskeletal protein binding	GO:0008092	7.87×10-2	1.67×10-1	NDRG1|1.88;STMN1|1.67;CLIP1|1.66;DBNL|1.6;S100A6|1.52;TAGLN2|1.51;KIF2A|0.71;FUS|0.67	8	1571	107	37689	http://www.ebi.ac.uk/QuickGO/GTerm?id=GO:0008092
4	4	carbon-nitrogen lyase activity	GO:0016840	7.92×10-2	1.67×10-1	APMAP|0.74	1	29	107	37689	http://www.ebi.ac.uk/QuickGO/GTerm?id=GO:0016840
5	5	thyroid hormone receptor binding	GO:0046966	7.92×10-2	1.67×10-1	FUS|0.67	1	29	107	37689	http://www.ebi.ac.uk/QuickGO/GTerm?id=GO:0046966
7	7	poly-purine tract binding	GO:0070717	8.18×10-2	1.71×10-1	PNPT1|0.69	1	30	107	37689	http://www.ebi.ac.uk/QuickGO/GTerm?id=GO:0070717
5	5	ATPase regulator activity	GO:0060590	8.18×10-2	1.71×10-1	ATP1B1|0.69	1	30	107	37689	http://www.ebi.ac.uk/QuickGO/GTerm?id=GO:0060590
4	4	histone binding	GO:0042393	8.27×10-2	1.72×10-1	SMARCA4|0.74;SMARCA5|0.7	2	168	107	37689	http://www.ebi.ac.uk/QuickGO/GTerm?id=GO:0042393
4	4	laminin binding	GO:0043236	8.44×10-2	1.74×10-1	CTSS|0.7	1	31	107	37689	http://www.ebi.ac.uk/QuickGO/GTerm?id=GO:0043236
6	6	anion transmembrane transporter activity	GO:0008509	8.52×10-2	1.74×10-1	SLC25A1|0.74;SLC7A5|0.63;SERINC1|0.62;PCYOX1|0.61	4	584	107	37689	http://www.ebi.ac.uk/QuickGO/GTerm?id=GO:0008509
5	5	microtubule binding	GO:0008017	8.65×10-2	1.74×10-1	NDRG1|1.88;CLIP1|1.66;KIF2A|0.71	3	366	107	37689	http://www.ebi.ac.uk/QuickGO/GTerm?id=GO:0008017
6	6	cyclin-dependent protein serine/threonine kinase regulator activity	GO:0016538	8.70×10-2	1.74×10-1	CDKN2A|1.86	1	32	107	37689	http://www.ebi.ac.uk/QuickGO/GTerm?id=GO:0016538
5	5	DNA topoisomerase type I activity	GO:0003917	8.70×10-2	1.74×10-1	TOP1|0.68	1	32	107	37689	http://www.ebi.ac.uk/QuickGO/GTerm?id=GO:0003917
7	7	cyclin-dependent protein kinase activity	GO:0097472	8.70×10-2	1.74×10-1	CDK1|0.69	1	32	107	37689	http://www.ebi.ac.uk/QuickGO/GTerm?id=GO:0097472
8	8	cyclin-dependent protein serine/threonine kinase activity	GO:0004693	8.70×10-2	1.74×10-1	CDK1|0.69	1	32	107	37689	http://www.ebi.ac.uk/QuickGO/GTerm?id=GO:0004693
7	7	nucleoside kinase activity	GO:0019206	8.70×10-2	1.74×10-1	NDUFA10|0.71	1	32	107	37689	http://www.ebi.ac.uk/QuickGO/GTerm?id=GO:0019206
6	6	hexosaminidase activity	GO:0015929	8.70×10-2	1.74×10-1	CD44|0.47	1	32	107	37689	http://www.ebi.ac.uk/QuickGO/GTerm?id=GO:0015929
4	4	phosphatase regulator activity	GO:0019208	8.78×10-2	1.75×10-1	GTF2F1|1.8;PPP1R12A|1.54	2	174	107	37689	http://www.ebi.ac.uk/QuickGO/GTerm?id=GO:0019208
8	8	phosphatidylinositol bisphosphate phosphatase activity	GO:0034593	8.96×10-2	1.77×10-1	PTPMT1|0.71	1	33	107	37689	http://www.ebi.ac.uk/QuickGO/GTerm?id=GO:0034593
6	6	adrenergic receptor binding	GO:0031690	8.96×10-2	1.77×10-1	C1QBP|0.7	1	33	107	37689	http://www.ebi.ac.uk/QuickGO/GTerm?id=GO:0031690
5	5	oxidoreductase activity, acting on a sulfur group of donors, NAD(P) as acceptor	GO:0016668	8.96×10-2	1.77×10-1	DLD|0.73	1	33	107	37689	http://www.ebi.ac.uk/QuickGO/GTerm?id=GO:0016668
5	5	steroid dehydrogenase activity, acting on the CH-OH group of donors, NAD or NADP as acceptor	GO:0033764	9.22×10-2	1.81×10-1	HSD17B4|0.54	1	34	107	37689	http://www.ebi.ac.uk/QuickGO/GTerm?id=GO:0033764
4	4	fibronectin binding	GO:0001968	9.48×10-2	1.85×10-1	CTSS|0.7	1	35	107	37689	http://www.ebi.ac.uk/QuickGO/GTerm?id=GO:0001968
5	5	acyl-CoA dehydrogenase activity	GO:0003995	9.48×10-2	1.85×10-1	ACAD9|0.64	1	35	107	37689	http://www.ebi.ac.uk/QuickGO/GTerm?id=GO:0003995
9	7,9	amino acid transmembrane transporter activity	GO:0015171	9.83×10-2	1.91×10-1	SLC7A5|0.63;SERINC1|0.62	2	186	107	37689	http://www.ebi.ac.uk/QuickGO/GTerm?id=GO:0015171
3	3	amide binding	GO:0033218	9.87×10-2	1.91×10-1	DLD|0.73;PHB2|0.67;SLC7A5|0.63	3	388	107	37689	http://www.ebi.ac.uk/QuickGO/GTerm?id=GO:0033218
4	4	steroid dehydrogenase activity	GO:0016229	9.99×10-2	1.92×10-1	HSD17B4|0.54	1	37	107	37689	http://www.ebi.ac.uk/QuickGO/GTerm?id=GO:0016229
8	8	helicase activity	GO:0004386	1.00×10-1	1.92×10-1	SMARCA4|0.74;DHX30|0.72;SMARCA5|0.7	3	391	107	37689	http://www.ebi.ac.uk/QuickGO/GTerm?id=GO:0004386
7	7	protein serine/threonine kinase inhibitor activity	GO:0030291	1.02×10-1	1.95×10-1	CDKN2A|1.86	1	38	107	37689	http://www.ebi.ac.uk/QuickGO/GTerm?id=GO:0030291
5	5	proteoglycan binding	GO:0043394	1.02×10-1	1.95×10-1	CTSS|0.7	1	38	107	37689	http://www.ebi.ac.uk/QuickGO/GTerm?id=GO:0043394
7	7	mRNA binding	GO:0003729	1.04×10-1	1.96×10-1	YBX3|0.72;C1QBP|0.7	2	192	107	37689	http://www.ebi.ac.uk/QuickGO/GTerm?id=GO:0003729
8	8	androgen receptor binding	GO:0050681	1.05×10-1	1.97×10-1	SMARCA4|0.74	1	39	107	37689	http://www.ebi.ac.uk/QuickGO/GTerm?id=GO:0050681
7	7	acid phosphatase activity	GO:0003993	1.05×10-1	1.97×10-1	ACP2|0.73	1	39	107	37689	http://www.ebi.ac.uk/QuickGO/GTerm?id=GO:0003993
6	6	structure-specific DNA binding	GO:0043566	1.05×10-1	1.97×10-1	SMARCA4|0.74;HDAC2|0.73;YBX3|0.72	3	399	107	37689	http://www.ebi.ac.uk/QuickGO/GTerm?id=GO:0043566
3	3	carbohydrate binding	GO:0030246	1.07×10-1	1.99×10-1	BSG|0.73;MLEC|0.71;GANAB|0.64	3	403	107	37689	http://www.ebi.ac.uk/QuickGO/GTerm?id=GO:0030246
6	6	gamma-tubulin binding	GO:0043015	1.08×10-1	1.99×10-1	NDRG1|1.88	1	40	107	37689	http://www.ebi.ac.uk/QuickGO/GTerm?id=GO:0043015
8	8	mRNA 3'-UTR binding	GO:0003730	1.08×10-1	1.99×10-1	YBX3|0.72	1	40	107	37689	http://www.ebi.ac.uk/QuickGO/GTerm?id=GO:0003730
7	7	phosphatidylinositol phosphate phosphatase activity	GO:0052866	1.10×10-1	2.03×10-1	PTPMT1|0.71	1	41	107	37689	http://www.ebi.ac.uk/QuickGO/GTerm?id=GO:0052866
5	5	ion transmembrane transporter activity	GO:0015075	1.11×10-1	2.04×10-1	S100A6|1.52;SFXN3|0.74;SLC25A1|0.74;ATP6V0D1|0.74;ATP5L|0.72;ATP1B1|0.69;SLC7A5|0.63;SERINC1|0.62;PCYOX1|0.61	9	1983	107	37689	http://www.ebi.ac.uk/QuickGO/GTerm?id=GO:0015075
5	5	oxidoreductase activity, acting on a sulfur group of donors, disulfide as acceptor	GO:0016671	1.15×10-1	2.09×10-1	ERO1L|0.58	1	43	107	37689	http://www.ebi.ac.uk/QuickGO/GTerm?id=GO:0016671
8	8	3'-5'-exoribonuclease activity	GO:0000175	1.15×10-1	2.09×10-1	PNPT1|0.69	1	43	107	37689	http://www.ebi.ac.uk/QuickGO/GTerm?id=GO:0000175
4	4	protein self-association	GO:0043621	1.15×10-1	2.09×10-1	MDH2|0.68	1	43	107	37689	http://www.ebi.ac.uk/QuickGO/GTerm?id=GO:0043621
5	5	intramolecular oxidoreductase activity, transposing S-S bonds	GO:0016864	1.18×10-1	2.11×10-1	ERO1L|0.58	1	44	107	37689	http://www.ebi.ac.uk/QuickGO/GTerm?id=GO:0016864
6	6	protein disulfide isomerase activity	GO:0003756	1.18×10-1	2.11×10-1	ERO1L|0.58	1	44	107	37689	http://www.ebi.ac.uk/QuickGO/GTerm?id=GO:0003756
3	3	structural constituent of muscle	GO:0008307	1.18×10-1	2.11×10-1	ASPH|0.63	1	44	107	37689	http://www.ebi.ac.uk/QuickGO/GTerm?id=GO:0008307
3	3	ion binding	GO:0043167	1.20×10-1	2.13×10-1	SLK|1.69;CLIP1|1.66;ZNF598|1.6;S100A11|1.58;SRI|1.57;UBE2K|1.53;S100A6|1.52;LPCAT1|0.74;AIFM1|0.74;MUT|0.74;SMARCA4|0.74;OAT|0.73;FKBP10|0.73;DLD|0.73;ITGA5|0.73;GNS|0.73;NARS2|0.72;DHX30|0.72;TUFM|0.71;KIF2A|0.71;NDUFA10|0.71;CYBA|0.7;LSG1|0.7;SMARCA5|0.7;NDUFA13|0.7;CARS2|0.7;CDK1|0.69;DNAJA3|0.69;CYB5B|0.69;HYOU1|0.69;USP39|0.69;ETHE1|0.68;CLPX|0.67;FUS|0.67;PARP1|0.66;ACAD9|0.64;MCCC2|0.64;LA…	42	12593	107	37689	http://www.ebi.ac.uk/QuickGO/GTerm?id=GO:0043167
5	5	sulfuric ester hydrolase activity	GO:0008484	1.20×10-1	2.13×10-1	GNS|0.73	1	45	107	37689	http://www.ebi.ac.uk/QuickGO/GTerm?id=GO:0008484
5	5	transcriptional activator activity, RNA polymerase II transcription factor binding	GO:0001190	1.20×10-1	2.13×10-1	SMARCA4|0.74	1	45	107	37689	http://www.ebi.ac.uk/QuickGO/GTerm?id=GO:0001190
8	8	exoribonuclease activity, producing 5'-phosphomonoesters	GO:0016896	1.20×10-1	2.13×10-1	PNPT1|0.69	1	45	107	37689	http://www.ebi.ac.uk/QuickGO/GTerm?id=GO:0016896
5	5	glutathione transferase activity	GO:0004364	1.23×10-1	2.15×10-1	GSTK1|0.56	1	46	107	37689	http://www.ebi.ac.uk/QuickGO/GTerm?id=GO:0004364
5	5	peptidase activator activity	GO:0016504	1.23×10-1	2.15×10-1	CLPX|0.67	1	46	107	37689	http://www.ebi.ac.uk/QuickGO/GTerm?id=GO:0016504
5	5	transaminase activity	GO:0008483	1.23×10-1	2.15×10-1	OAT|0.73	1	46	107	37689	http://www.ebi.ac.uk/QuickGO/GTerm?id=GO:0008483
4	4	macrolide binding	GO:0005527	1.28×10-1	2.20×10-1	FKBP10|0.73	1	48	107	37689	http://www.ebi.ac.uk/QuickGO/GTerm?id=GO:0005527
4	4	transferase activity, transferring nitrogenous groups	GO:0016769	1.28×10-1	2.20×10-1	OAT|0.73	1	48	107	37689	http://www.ebi.ac.uk/QuickGO/GTerm?id=GO:0016769
4	4	glutathione peroxidase activity	GO:0004602	1.28×10-1	2.20×10-1	GSTK1|0.56	1	48	107	37689	http://www.ebi.ac.uk/QuickGO/GTerm?id=GO:0004602
5	5	FK506 binding	GO:0005528	1.28×10-1	2.20×10-1	FKBP10|0.73	1	48	107	37689	http://www.ebi.ac.uk/QuickGO/GTerm?id=GO:0005528
7	7	exoribonuclease activity	GO:0004532	1.30×10-1	2.23×10-1	PNPT1|0.69	1	49	107	37689	http://www.ebi.ac.uk/QuickGO/GTerm?id=GO:0004532
5	5	oxidoreductase activity, acting on single donors with incorporation of molecular oxygen, incorporation of two atoms of oxygen	GO:0016702	1.30×10-1	2.23×10-1	ETHE1|0.68	1	49	107	37689	http://www.ebi.ac.uk/QuickGO/GTerm?id=GO:0016702
7	7	translation elongation factor activity	GO:0003746	1.33×10-1	2.26×10-1	TUFM|0.71	1	50	107	37689	http://www.ebi.ac.uk/QuickGO/GTerm?id=GO:0003746
9	9	hydrogen ion transmembrane transporter activity	GO:0015078	1.36×10-1	2.32×10-1	ATP6V0D1|0.74;ATP5L|0.72	2	227	107	37689	http://www.ebi.ac.uk/QuickGO/GTerm?id=GO:0015078
4	4	oxidoreductase activity, acting on single donors with incorporation of molecular oxygen	GO:0016701	1.38×10-1	2.33×10-1	ETHE1|0.68	1	52	107	37689	http://www.ebi.ac.uk/QuickGO/GTerm?id=GO:0016701
3	3	extracellular matrix binding	GO:0050840	1.40×10-1	2.36×10-1	CTSS|0.7	1	53	107	37689	http://www.ebi.ac.uk/QuickGO/GTerm?id=GO:0050840
2	2	molecular function regulator	GO:0098772	1.43×10-1	2.40×10-1	CDKN2A|1.86;GTF2F1|1.8;DBNL|1.6;SRI|1.57;PPP1R12A|1.54;SERPINH1|0.72;ATP1B1|0.69;DNAJA3|0.69;CLPX|0.67	9	2100	107	37689	http://www.ebi.ac.uk/QuickGO/GTerm?id=GO:0098772
5	5	oxidoreductase activity, acting on the CH-OH group of donors, NAD or NADP as acceptor	GO:0016616	1.44×10-1	2.41×10-1	MDH2|0.68;HSD17B4|0.54	2	235	107	37689	http://www.ebi.ac.uk/QuickGO/GTerm?id=GO:0016616
6	6	threonine-type peptidase activity	GO:0070003	1.45×10-1	2.41×10-1	PSMA1|1.74	1	55	107	37689	http://www.ebi.ac.uk/QuickGO/GTerm?id=GO:0070003
7	7	threonine-type endopeptidase activity	GO:0004298	1.45×10-1	2.41×10-1	PSMA1|1.74	1	55	107	37689	http://www.ebi.ac.uk/QuickGO/GTerm?id=GO:0004298
6	6	O-acyltransferase activity	GO:0008374	1.47×10-1	2.44×10-1	LPCAT1|0.74	1	56	107	37689	http://www.ebi.ac.uk/QuickGO/GTerm?id=GO:0008374
6	6	NAD+ ADP-ribosyltransferase activity	GO:0003950	1.47×10-1	2.44×10-1	PARP1|0.66	1	56	107	37689	http://www.ebi.ac.uk/QuickGO/GTerm?id=GO:0003950
4	4	substrate-specific transmembrane transporter activity	GO:0022891	1.48×10-1	2.44×10-1	S100A6|1.52;SFXN3|0.74;SLC25A1|0.74;ATP6V0D1|0.74;ATP5L|0.72;ATP1B1|0.69;SLC7A5|0.63;SERINC1|0.62;PCYOX1|0.61	9	2119	107	37689	http://www.ebi.ac.uk/QuickGO/GTerm?id=GO:0022891
5	5	hydrolase activity, hydrolyzing O-glycosyl compounds	GO:0004553	1.52×10-1	2.47×10-1	GANAB|0.64;CD44|0.47	2	243	107	37689	http://www.ebi.ac.uk/QuickGO/GTerm?id=GO:0004553
3	3	modified amino acid binding	GO:0072341	1.52×10-1	2.47×10-1	MUT|0.74	1	58	107	37689	http://www.ebi.ac.uk/QuickGO/GTerm?id=GO:0072341
6	6	histone deacetylase activity	GO:0004407	1.52×10-1	2.47×10-1	HDAC2|0.73	1	58	107	37689	http://www.ebi.ac.uk/QuickGO/GTerm?id=GO:0004407
5	5	ribosome binding	GO:0043022	1.52×10-1	2.47×10-1	C1QBP|0.7	1	58	107	37689	http://www.ebi.ac.uk/QuickGO/GTerm?id=GO:0043022
5	5	protein deacetylase activity	GO:0033558	1.55×10-1	2.50×10-1	HDAC2|0.73	1	59	107	37689	http://www.ebi.ac.uk/QuickGO/GTerm?id=GO:0033558
5	5	retinoic acid receptor binding	GO:0042974	1.57×10-1	2.53×10-1	FUS|0.67	1	60	107	37689	http://www.ebi.ac.uk/QuickGO/GTerm?id=GO:0042974
4	4	phosphoprotein binding	GO:0051219	1.57×10-1	2.53×10-1	ACP2|0.73	1	60	107	37689	http://www.ebi.ac.uk/QuickGO/GTerm?id=GO:0051219
6	6	cholesterol binding	GO:0015485	1.59×10-1	2.55×10-1	ERLIN1|0.69	1	61	107	37689	http://www.ebi.ac.uk/QuickGO/GTerm?id=GO:0015485
4	4	enzyme activator activity	GO:0008047	1.60×10-1	2.55×10-1	GTF2F1|1.8;DBNL|1.6;ATP1B1|0.69;CLPX|0.67	4	740	107	37689	http://www.ebi.ac.uk/QuickGO/GTerm?id=GO:0008047
5	5	receptor tyrosine kinase binding	GO:0030971	1.62×10-1	2.57×10-1	DNAJA3|0.69	1	62	107	37689	http://www.ebi.ac.uk/QuickGO/GTerm?id=GO:0030971
7	7	protein tyrosine kinase binding	GO:1990782	1.62×10-1	2.57×10-1	DNAJA3|0.69	1	62	107	37689	http://www.ebi.ac.uk/QuickGO/GTerm?id=GO:1990782
4	4	cell adhesion molecule binding	GO:0050839	1.65×10-1	2.61×10-1	NDRG1|1.88;ITGA5|0.73	2	256	107	37689	http://www.ebi.ac.uk/QuickGO/GTerm?id=GO:0050839
4	4	oxidoreductase activity, acting on CH-OH group of donors	GO:0016614	1.66×10-1	2.62×10-1	MDH2|0.68;HSD17B4|0.54	2	257	107	37689	http://www.ebi.ac.uk/QuickGO/GTerm?id=GO:0016614
8	8	hydrogen-exporting ATPase activity	GO:0036442	1.66×10-1	2.62×10-1	ATP6V0D1|0.74	1	64	107	37689	http://www.ebi.ac.uk/QuickGO/GTerm?id=GO:0036442
5	5	sterol binding	GO:0032934	1.69×10-1	2.65×10-1	ERLIN1|0.69	1	65	107	37689	http://www.ebi.ac.uk/QuickGO/GTerm?id=GO:0032934
3	3	substrate-specific transporter activity	GO:0022892	1.70×10-1	2.66×10-1	S100A6|1.52;SFXN3|0.74;SLC25A1|0.74;ATP6V0D1|0.74;ATP5L|0.72;ATP1B1|0.69;SEC62|0.68;SLC7A5|0.63;SERINC1|0.62;PCYOX1|0.61	10	2492	107	37689	http://www.ebi.ac.uk/QuickGO/GTerm?id=GO:0022892
4	4	glycosaminoglycan binding	GO:0005539	1.76×10-1	2.73×10-1	C1QBP|0.7;CD44|0.47	2	267	107	37689	http://www.ebi.ac.uk/QuickGO/GTerm?id=GO:0005539
6	6	ionotropic glutamate receptor binding	GO:0035255	1.76×10-1	2.73×10-1	FUS|0.67	1	68	107	37689	http://www.ebi.ac.uk/QuickGO/GTerm?id=GO:0035255
4	4	hydrolase activity, acting on ester bonds	GO:0016788	1.76×10-1	2.73×10-1	APMAP|0.74;ACP2|0.73;GNS|0.73;PTPMT1|0.71;PNPT1|0.69;LARS2|0.64;NCEH1|0.63	7	1617	107	37689	http://www.ebi.ac.uk/QuickGO/GTerm?id=GO:0016788
7	7	transcription regulatory region sequence-specific DNA binding	GO:0000976	1.78×10-1	2.74×10-1	SMARCA4|0.74;HDAC2|0.73;YBX3|0.72;TOP1|0.68	4	773	107	37689	http://www.ebi.ac.uk/QuickGO/GTerm?id=GO:0000976
5	5	myosin binding	GO:0017022	1.78×10-1	2.74×10-1	FUS|0.67	1	69	107	37689	http://www.ebi.ac.uk/QuickGO/GTerm?id=GO:0017022
4	4	enzyme inhibitor activity	GO:0004857	1.81×10-1	2.78×10-1	CDKN2A|1.86;PPP1R12A|1.54;SERPINH1|0.72	3	516	107	37689	http://www.ebi.ac.uk/QuickGO/GTerm?id=GO:0004857
4	4	deacetylase activity	GO:0019213	1.85×10-1	2.82×10-1	HDAC2|0.73	1	72	107	37689	http://www.ebi.ac.uk/QuickGO/GTerm?id=GO:0019213
5	5	ATPase binding	GO:0051117	1.85×10-1	2.82×10-1	ATP1B1|0.69	1	72	107	37689	http://www.ebi.ac.uk/QuickGO/GTerm?id=GO:0051117
4	4	p53 binding	GO:0002039	1.88×10-1	2.85×10-1	SMARCA4|0.74	1	73	107	37689	http://www.ebi.ac.uk/QuickGO/GTerm?id=GO:0002039
4	4	SMAD binding	GO:0046332	1.92×10-1	2.90×10-1	PARP1|0.66	1	75	107	37689	http://www.ebi.ac.uk/QuickGO/GTerm?id=GO:0046332
4	4	calcium channel regulator activity	GO:0005246	1.92×10-1	2.90×10-1	SRI|1.57	1	75	107	37689	http://www.ebi.ac.uk/QuickGO/GTerm?id=GO:0005246
4	4	hydrolase activity, acting on carbon-nitrogen (but not peptide) bonds	GO:0016810	1.95×10-1	2.94×10-1	HDAC2|0.73;GLS|0.72	2	286	107	37689	http://www.ebi.ac.uk/QuickGO/GTerm?id=GO:0016810
6	6	protein kinase inhibitor activity	GO:0004860	1.99×10-1	2.99×10-1	CDKN2A|1.86	1	78	107	37689	http://www.ebi.ac.uk/QuickGO/GTerm?id=GO:0004860
6	5,6	actin filament binding	GO:0051015	2.01×10-1	3.01×10-1	DBNL|1.6;TAGLN2|1.51	2	292	107	37689	http://www.ebi.ac.uk/QuickGO/GTerm?id=GO:0051015
5	5	oxidoreductase activity, acting on paired donors, with incorporation or reduction of molecular oxygen, 2-oxoglutarate as one donor, and incorporation of one atom each of oxygen into both donors	GO:0016706	2.04×10-1	3.04×10-1	ASPH|0.63	1	80	107	37689	http://www.ebi.ac.uk/QuickGO/GTerm?id=GO:0016706
5	5	kinase inhibitor activity	GO:0019210	2.06×10-1	3.05×10-1	CDKN2A|1.86	1	81	107	37689	http://www.ebi.ac.uk/QuickGO/GTerm?id=GO:0019210
6	6	single-stranded RNA binding	GO:0003727	2.06×10-1	3.05×10-1	PNPT1|0.69	1	81	107	37689	http://www.ebi.ac.uk/QuickGO/GTerm?id=GO:0003727
6	6	double-stranded RNA binding	GO:0003725	2.13×10-1	3.12×10-1	DHX30|0.72	1	84	107	37689	http://www.ebi.ac.uk/QuickGO/GTerm?id=GO:0003725
5	5	heme binding	GO:0020037	2.13×10-1	3.12×10-1	CYBA|0.7;CYB5B|0.69	2	303	107	37689	http://www.ebi.ac.uk/QuickGO/GTerm?id=GO:0020037
3	3	antigen binding	GO:0003823	2.13×10-1	3.12×10-1	ATP1B1|0.69;SLC7A5|0.63	2	303	107	37689	http://www.ebi.ac.uk/QuickGO/GTerm?id=GO:0003823
5	5	protein heterodimerization activity	GO:0046982	2.13×10-1	3.12×10-1	SRI|1.57;CYBA|0.7;TOP2A|0.6	3	560	107	37689	http://www.ebi.ac.uk/QuickGO/GTerm?id=GO:0046982
4	4	intramolecular transferase activity	GO:0016866	2.15×10-1	3.14×10-1	MUT|0.74	1	85	107	37689	http://www.ebi.ac.uk/QuickGO/GTerm?id=GO:0016866
3	3	peroxidase activity	GO:0004601	2.19×10-1	3.17×10-1	GSTK1|0.56	1	87	107	37689	http://www.ebi.ac.uk/QuickGO/GTerm?id=GO:0004601
7	7	aspartic-type endopeptidase activity	GO:0004190	2.19×10-1	3.17×10-1	HM13|0.71	1	87	107	37689	http://www.ebi.ac.uk/QuickGO/GTerm?id=GO:0004190
5	5	glutamate receptor binding	GO:0035254	2.19×10-1	3.17×10-1	FUS|0.67	1	87	107	37689	http://www.ebi.ac.uk/QuickGO/GTerm?id=GO:0035254
3	3	transmembrane transporter activity	GO:0022857	2.21×10-1	3.19×10-1	S100A6|1.52;SFXN3|0.74;SLC25A1|0.74;ATP6V0D1|0.74;ATP5L|0.72;ATP1B1|0.69;SLC7A5|0.63;SERINC1|0.62;PCYOX1|0.61	9	2344	107	37689	http://www.ebi.ac.uk/QuickGO/GTerm?id=GO:0022857
6	6	aspartic-type peptidase activity	GO:0070001	2.22×10-1	3.19×10-1	HM13|0.71	1	88	107	37689	http://www.ebi.ac.uk/QuickGO/GTerm?id=GO:0070001
4	4	hydrolase activity, acting on glycosyl bonds	GO:0016798	2.23×10-1	3.19×10-1	GANAB|0.64;CD44|0.47	2	313	107	37689	http://www.ebi.ac.uk/QuickGO/GTerm?id=GO:0016798
2	2	transporter activity	GO:0005215	2.25×10-1	3.19×10-1	S100A6|1.52;SFXN3|0.74;SLC25A1|0.74;ATP6V0D1|0.74;ATP5L|0.72;ATP1B1|0.69;SEC62|0.68;SLC7A5|0.63;SERINC1|0.62;SLCO3A1|0.61;PCYOX1|0.61	11	2979	107	37689	http://www.ebi.ac.uk/QuickGO/GTerm?id=GO:0005215
4	4	peptidase regulator activity	GO:0061134	2.25×10-1	3.19×10-1	SERPINH1|0.72;CLPX|0.67	2	315	107	37689	http://www.ebi.ac.uk/QuickGO/GTerm?id=GO:0061134
4	4	monosaccharide binding	GO:0048029	2.26×10-1	3.19×10-1	BSG|0.73	1	90	107	37689	http://www.ebi.ac.uk/QuickGO/GTerm?id=GO:0048029
5	5	cadherin binding	GO:0045296	2.26×10-1	3.19×10-1	NDRG1|1.88	1	90	107	37689	http://www.ebi.ac.uk/QuickGO/GTerm?id=GO:0045296
4	4	oxidoreductase activity, acting on peroxide as acceptor	GO:0016684	2.26×10-1	3.19×10-1	GSTK1|0.56	1	90	107	37689	http://www.ebi.ac.uk/QuickGO/GTerm?id=GO:0016684
8	8	calcium-dependent cysteine-type endopeptidase activity	GO:0004198	2.28×10-1	3.21×10-1	SRI|1.57	1	91	107	37689	http://www.ebi.ac.uk/QuickGO/GTerm?id=GO:0004198
4	4	active transmembrane transporter activity	GO:0022804	2.29×10-1	3.22×10-1	ATP6V0D1|0.74;ATP1B1|0.69;SLC7A5|0.63;PCYOX1|0.61	4	861	107	37689	http://www.ebi.ac.uk/QuickGO/GTerm?id=GO:0022804
8	8	core promoter sequence-specific DNA binding	GO:0001046	2.30×10-1	3.22×10-1	TOP1|0.68	1	92	107	37689	http://www.ebi.ac.uk/QuickGO/GTerm?id=GO:0001046
7	7	exonuclease activity, active with either ribo- or deoxyribonucleic acids and producing 5'-phosphomonoesters	GO:0016796	2.30×10-1	3.22×10-1	PNPT1|0.69	1	92	107	37689	http://www.ebi.ac.uk/QuickGO/GTerm?id=GO:0016796
8	8	protein tyrosine/serine/threonine phosphatase activity	GO:0008138	2.37×10-1	3.30×10-1	PTPMT1|0.71	1	95	107	37689	http://www.ebi.ac.uk/QuickGO/GTerm?id=GO:0008138
5	5	RNA polymerase II transcription factor binding	GO:0001085	2.39×10-1	3.30×10-1	HDAC2|0.73	1	96	107	37689	http://www.ebi.ac.uk/QuickGO/GTerm?id=GO:0001085
7	7	3'-5' exonuclease activity	GO:0008408	2.39×10-1	3.30×10-1	PNPT1|0.69	1	96	107	37689	http://www.ebi.ac.uk/QuickGO/GTerm?id=GO:0008408
5	5	histone deacetylase binding	GO:0042826	2.39×10-1	3.30×10-1	TOP2A|0.6	1	96	107	37689	http://www.ebi.ac.uk/QuickGO/GTerm?id=GO:0042826
5	5	hydro-lyase activity	GO:0016836	2.41×10-1	3.32×10-1	HSD17B4|0.54	1	97	107	37689	http://www.ebi.ac.uk/QuickGO/GTerm?id=GO:0016836
5	5	G-protein coupled receptor binding	GO:0001664	2.44×10-1	3.35×10-1	C1QBP|0.7;ITGB4|0.65	2	333	107	37689	http://www.ebi.ac.uk/QuickGO/GTerm?id=GO:0001664
4	4	ribonucleoprotein complex binding	GO:0043021	2.46×10-1	3.36×10-1	C1QBP|0.7	1	99	107	37689	http://www.ebi.ac.uk/QuickGO/GTerm?id=GO:0043021
5	5	cytokine receptor binding	GO:0005126	2.47×10-1	3.37×10-1	ITGA5|0.73;DNAJA3|0.69	2	336	107	37689	http://www.ebi.ac.uk/QuickGO/GTerm?id=GO:0005126
5	5	DNA binding	GO:0003677	2.48×10-1	3.38×10-1	GTF2F1|1.8;SRRM1|1.69;AIFM1|0.74;SMARCA4|0.74;HDAC2|0.73;YBX3|0.72;SMARCA5|0.7;TOP1|0.68;POLDIP2|0.68;FUS|0.67;PARP1|0.66;TMPO|0.61;TOP2A|0.6;SSRP1|0.5	14	4018	107	37689	http://www.ebi.ac.uk/QuickGO/GTerm?id=GO:0003677
6	6	ubiquitin protein ligase binding	GO:0031625	2.50×10-1	3.40×10-1	UBE2K|1.53;HM13|0.71	2	339	107	37689	http://www.ebi.ac.uk/QuickGO/GTerm?id=GO:0031625
5	5	ubiquitin-like protein ligase binding	GO:0044389	2.55×10-1	3.44×10-1	UBE2K|1.53;HM13|0.71	2	343	107	37689	http://www.ebi.ac.uk/QuickGO/GTerm?id=GO:0044389
4	4	glycoprotein binding	GO:0001948	2.61×10-1	3.50×10-1	CTSS|0.7	1	106	107	37689	http://www.ebi.ac.uk/QuickGO/GTerm?id=GO:0001948
5	5	protease binding	GO:0002020	2.61×10-1	3.50×10-1	SRI|1.57	1	106	107	37689	http://www.ebi.ac.uk/QuickGO/GTerm?id=GO:0002020
4	4	transferase activity, transferring alkyl or aryl (other than methyl) groups	GO:0016765	2.69×10-1	3.61×10-1	GSTK1|0.56	1	110	107	37689	http://www.ebi.ac.uk/QuickGO/GTerm?id=GO:0016765
6	6	calcium ion binding	GO:0005509	2.70×10-1	3.61×10-1	S100A11|1.58;SRI|1.57;S100A6|1.52;LPCAT1|0.74;FKBP10|0.73;ASPH|0.63	6	1533	107	37689	http://www.ebi.ac.uk/QuickGO/GTerm?id=GO:0005509
5	5	integrin binding	GO:0005178	2.71×10-1	3.61×10-1	ITGA5|0.73	1	111	107	37689	http://www.ebi.ac.uk/QuickGO/GTerm?id=GO:0005178
4	4	transferase activity, transferring glycosyl groups	GO:0016757	2.71×10-1	3.61×10-1	DDOST|0.74;STT3A|0.73;PARP1|0.66	3	637	107	37689	http://www.ebi.ac.uk/QuickGO/GTerm?id=GO:0016757
7	7	transcription regulatory region DNA binding	GO:0044212	2.80×10-1	3.71×10-1	SMARCA4|0.74;HDAC2|0.73;YBX3|0.72;TOP1|0.68	4	943	107	37689	http://www.ebi.ac.uk/QuickGO/GTerm?id=GO:0044212
5	4,5	peptide antigen binding	GO:0042605	2.83×10-1	3.75×10-1	SLC7A5|0.63	1	117	107	37689	http://www.ebi.ac.uk/QuickGO/GTerm?id=GO:0042605
5	5	ubiquitin binding	GO:0043130	2.85×10-1	3.77×10-1	TOP2A|0.6	1	118	107	37689	http://www.ebi.ac.uk/QuickGO/GTerm?id=GO:0043130
5	5	transferase activity, transferring pentosyl groups	GO:0016763	2.89×10-1	3.81×10-1	PARP1|0.66	1	120	107	37689	http://www.ebi.ac.uk/QuickGO/GTerm?id=GO:0016763
4	4	vitamin binding	GO:0019842	2.91×10-1	3.83×10-1	MUT|0.74	1	121	107	37689	http://www.ebi.ac.uk/QuickGO/GTerm?id=GO:0019842
7	7	Ras GTPase binding	GO:0017016	2.93×10-1	3.84×10-1	NDRG1|1.88;YBX3|0.72	2	380	107	37689	http://www.ebi.ac.uk/QuickGO/GTerm?id=GO:0017016
5	5	SH3 domain binding	GO:0017124	3.02×10-1	3.93×10-1	CYBA|0.7	1	126	107	37689	http://www.ebi.ac.uk/QuickGO/GTerm?id=GO:0017124
9	9	RNA polymerase II core promoter proximal region sequence-specific DNA binding	GO:0000978	3.03×10-1	3.93×10-1	SMARCA4|0.74;HDAC2|0.73	2	389	107	37689	http://www.ebi.ac.uk/QuickGO/GTerm?id=GO:0000978
9	8,9	RNA polymerase II regulatory region sequence-specific DNA binding	GO:0000977	3.04×10-1	3.93×10-1	SMARCA4|0.74;HDAC2|0.73;YBX3|0.72	3	680	107	37689	http://www.ebi.ac.uk/QuickGO/GTerm?id=GO:0000977
7	7	cysteine-type endopeptidase activity	GO:0004197	3.06×10-1	3.93×10-1	SRI|1.57;CTSS|0.7	2	392	107	37689	http://www.ebi.ac.uk/QuickGO/GTerm?id=GO:0004197
8	8	RNA polymerase II regulatory region DNA binding	GO:0001012	3.07×10-1	3.93×10-1	SMARCA4|0.74;HDAC2|0.73;YBX3|0.72	3	683	107	37689	http://www.ebi.ac.uk/QuickGO/GTerm?id=GO:0001012
5	5	regulatory region nucleic acid binding	GO:0001067	3.07×10-1	3.93×10-1	SMARCA4|0.74;HDAC2|0.73;YBX3|0.72;TOP1|0.68	4	986	107	37689	http://www.ebi.ac.uk/QuickGO/GTerm?id=GO:0001067
6	6	regulatory region DNA binding	GO:0000975	3.07×10-1	3.93×10-1	SMARCA4|0.74;HDAC2|0.73;YBX3|0.72;TOP1|0.68	4	986	107	37689	http://www.ebi.ac.uk/QuickGO/GTerm?id=GO:0000975
4	4	ubiquitin-like protein binding	GO:0032182	3.07×10-1	3.93×10-1	TOP2A|0.6	1	129	107	37689	http://www.ebi.ac.uk/QuickGO/GTerm?id=GO:0032182
4	4	intramolecular oxidoreductase activity	GO:0016860	3.07×10-1	3.93×10-1	ERO1L|0.58	1	129	107	37689	http://www.ebi.ac.uk/QuickGO/GTerm?id=GO:0016860
3	3	lyase activity	GO:0016829	3.11×10-1	3.94×10-1	APMAP|0.74;HSD17B4|0.54	2	397	107	37689	http://www.ebi.ac.uk/QuickGO/GTerm?id=GO:0016829
5	4,5	pyridoxal phosphate binding	GO:0030170	3.11×10-1	3.94×10-1	OAT|0.73	1	131	107	37689	http://www.ebi.ac.uk/QuickGO/GTerm?id=GO:0030170
8	8	Rab GTPase binding	GO:0017137	3.11×10-1	3.94×10-1	NDRG1|1.88	1	131	107	37689	http://www.ebi.ac.uk/QuickGO/GTerm?id=GO:0017137
8	8	chloride transmembrane transporter activity	GO:0015108	3.11×10-1	3.94×10-1	PCYOX1|0.61	1	131	107	37689	http://www.ebi.ac.uk/QuickGO/GTerm?id=GO:0015108
5	5	transferase activity, transferring hexosyl groups	GO:0016758	3.18×10-1	4.01×10-1	DDOST|0.74;STT3A|0.73	2	404	107	37689	http://www.ebi.ac.uk/QuickGO/GTerm?id=GO:0016758
4	4	steroid binding	GO:0005496	3.19×10-1	4.01×10-1	ERLIN1|0.69	1	135	107	37689	http://www.ebi.ac.uk/QuickGO/GTerm?id=GO:0005496
7	7	phosphoprotein phosphatase activity	GO:0004721	3.20×10-1	4.01×10-1	ACP2|0.73;PTPMT1|0.71	2	405	107	37689	http://www.ebi.ac.uk/QuickGO/GTerm?id=GO:0004721
6	6	small GTPase binding	GO:0031267	3.25×10-1	4.06×10-1	NDRG1|1.88;YBX3|0.72	2	410	107	37689	http://www.ebi.ac.uk/QuickGO/GTerm?id=GO:0031267
5	5	RNA polymerase II transcription cofactor activity	GO:0001104	3.25×10-1	4.06×10-1	SMARCA4|0.74	1	138	107	37689	http://www.ebi.ac.uk/QuickGO/GTerm?id=GO:0001104
6	6	nucleobase-containing compound kinase activity	GO:0019205	3.27×10-1	4.07×10-1	NDUFA10|0.71	1	139	107	37689	http://www.ebi.ac.uk/QuickGO/GTerm?id=GO:0019205
8	8	core promoter proximal region sequence-specific DNA binding	GO:0000987	3.34×10-1	4.14×10-1	SMARCA4|0.74;HDAC2|0.73	2	419	107	37689	http://www.ebi.ac.uk/QuickGO/GTerm?id=GO:0000987
4	4	alcohol binding	GO:0043178	3.35×10-1	4.14×10-1	ERLIN1|0.69	1	143	107	37689	http://www.ebi.ac.uk/QuickGO/GTerm?id=GO:0043178
8	8	core promoter proximal region DNA binding	GO:0001159	3.36×10-1	4.15×10-1	SMARCA4|0.74;HDAC2|0.73	2	421	107	37689	http://www.ebi.ac.uk/QuickGO/GTerm?id=GO:0001159
5	5	peptidyl-prolyl cis-trans isomerase activity	GO:0003755	3.36×10-1	4.15×10-1	FKBP10|0.73	1	144	107	37689	http://www.ebi.ac.uk/QuickGO/GTerm?id=GO:0003755
4	4	cis-trans isomerase activity	GO:0016859	3.38×10-1	4.16×10-1	FKBP10|0.73	1	145	107	37689	http://www.ebi.ac.uk/QuickGO/GTerm?id=GO:0016859
4	4	carbon-oxygen lyase activity	GO:0016835	3.42×10-1	4.18×10-1	HSD17B4|0.54	1	147	107	37689	http://www.ebi.ac.uk/QuickGO/GTerm?id=GO:0016835
2	2	antioxidant activity	GO:0016209	3.42×10-1	4.18×10-1	GSTK1|0.56	1	147	107	37689	http://www.ebi.ac.uk/QuickGO/GTerm?id=GO:0016209
7	7	serine-type endopeptidase inhibitor activity	GO:0004867	3.48×10-1	4.24×10-1	SERPINH1|0.72	1	150	107	37689	http://www.ebi.ac.uk/QuickGO/GTerm?id=GO:0004867
5	5	GTPase binding	GO:0051020	3.54×10-1	4.30×10-1	NDRG1|1.88;YBX3|0.72	2	438	107	37689	http://www.ebi.ac.uk/QuickGO/GTerm?id=GO:0051020
4	4	protein transporter activity	GO:0008565	3.57×10-1	4.32×10-1	SEC62|0.68	1	155	107	37689	http://www.ebi.ac.uk/QuickGO/GTerm?id=GO:0008565
6	6	exonuclease activity	GO:0004527	3.57×10-1	4.32×10-1	PNPT1|0.69	1	155	107	37689	http://www.ebi.ac.uk/QuickGO/GTerm?id=GO:0004527
7	7	single-stranded DNA binding	GO:0003697	3.61×10-1	4.35×10-1	YBX3|0.72	1	157	107	37689	http://www.ebi.ac.uk/QuickGO/GTerm?id=GO:0003697
8	8	monovalent inorganic cation transmembrane transporter activity	GO:0015077	3.62×10-1	4.35×10-1	ATP6V0D1|0.74;ATP5L|0.72;ATP1B1|0.69	3	754	107	37689	http://www.ebi.ac.uk/QuickGO/GTerm?id=GO:0015077
5	5	growth factor receptor binding	GO:0070851	3.62×10-1	4.35×10-1	ITGA5|0.73	1	158	107	37689	http://www.ebi.ac.uk/QuickGO/GTerm?id=GO:0070851
8	8	Rho GTPase binding	GO:0017048	3.66×10-1	4.39×10-1	YBX3|0.72	1	160	107	37689	http://www.ebi.ac.uk/QuickGO/GTerm?id=GO:0017048
6	6	acetyltransferase activity	GO:0016407	3.68×10-1	4.39×10-1	LPCAT1|0.74	1	161	107	37689	http://www.ebi.ac.uk/QuickGO/GTerm?id=GO:0016407
6	6	cytokine receptor activity	GO:0004896	3.68×10-1	4.39×10-1	CD44|0.47	1	161	107	37689	http://www.ebi.ac.uk/QuickGO/GTerm?id=GO:0004896
6	6	cation transmembrane transporter activity	GO:0008324	3.76×10-1	4.47×10-1	ATP6V0D1|0.74;ATP5L|0.72;ATP1B1|0.69;SLC7A5|0.63;SERINC1|0.62	5	1417	107	37689	http://www.ebi.ac.uk/QuickGO/GTerm?id=GO:0008324
6	6	ribonuclease activity	GO:0004540	3.93×10-1	4.66×10-1	PNPT1|0.69	1	175	107	37689	http://www.ebi.ac.uk/QuickGO/GTerm?id=GO:0004540
7	7	double-stranded DNA binding	GO:0003690	4.06×10-1	4.80×10-1	YBX3|0.72	1	183	107	37689	http://www.ebi.ac.uk/QuickGO/GTerm?id=GO:0003690
5	5	transcriptional repressor activity, RNA polymerase II transcription regulatory region sequence-specific binding	GO:0001227	4.06×10-1	4.80×10-1	YBX3|0.72	1	183	107	37689	http://www.ebi.ac.uk/QuickGO/GTerm?id=GO:0001227
4	4	transcription factor activity, RNA polymerase II transcription factor binding	GO:0001076	4.11×10-1	4.85×10-1	SMARCA4|0.74	1	186	107	37689	http://www.ebi.ac.uk/QuickGO/GTerm?id=GO:0001076
5	5	protein kinase regulator activity	GO:0019887	4.20×10-1	4.93×10-1	CDKN2A|1.86	1	191	107	37689	http://www.ebi.ac.uk/QuickGO/GTerm?id=GO:0019887
3	3	channel regulator activity	GO:0016247	4.23×10-1	4.96×10-1	SRI|1.57	1	193	107	37689	http://www.ebi.ac.uk/QuickGO/GTerm?id=GO:0016247
4	4	transferase activity, transferring acyl groups	GO:0016746	4.39×10-1	5.14×10-1	LPCAT1|0.74;CS|0.68	2	524	107	37689	http://www.ebi.ac.uk/QuickGO/GTerm?id=GO:0016746
8	8	GTPase activity	GO:0003924	4.41×10-1	5.15×10-1	TUFM|0.71;LSG1|0.7	2	526	107	37689	http://www.ebi.ac.uk/QuickGO/GTerm?id=GO:0003924
6	6	cysteine-type peptidase activity	GO:0008234	4.42×10-1	5.15×10-1	SRI|1.57;CTSS|0.7	2	527	107	37689	http://www.ebi.ac.uk/QuickGO/GTerm?id=GO:0008234
6	6	endopeptidase activity	GO:0004175	4.47×10-1	5.19×10-1	PSMA1|1.74;SRI|1.57;HM13|0.71;CTSS|0.7	4	1203	107	37689	http://www.ebi.ac.uk/QuickGO/GTerm?id=GO:0004175
6	6	translation factor activity, RNA binding	GO:0008135	4.50×10-1	5.22×10-1	TUFM|0.71	1	210	107	37689	http://www.ebi.ac.uk/QuickGO/GTerm?id=GO:0008135
4	4	kinase regulator activity	GO:0019207	4.72×10-1	5.45×10-1	CDKN2A|1.86	1	224	107	37689	http://www.ebi.ac.uk/QuickGO/GTerm?id=GO:0019207
10	10	RNA-dependent ATPase activity	GO:0008186	4.75×10-1	5.46×10-1	DHX30|0.72	1	226	107	37689	http://www.ebi.ac.uk/QuickGO/GTerm?id=GO:0008186
11	10,11	ATP-dependent RNA helicase activity	GO:0004004	4.75×10-1	5.46×10-1	DHX30|0.72	1	226	107	37689	http://www.ebi.ac.uk/QuickGO/GTerm?id=GO:0004004
9	9	RNA helicase activity	GO:0003724	4.78×10-1	5.47×10-1	DHX30|0.72	1	228	107	37689	http://www.ebi.ac.uk/QuickGO/GTerm?id=GO:0003724
9	9	microtubule motor activity	GO:0003777	4.78×10-1	5.47×10-1	KIF2A|0.71	1	228	107	37689	http://www.ebi.ac.uk/QuickGO/GTerm?id=GO:0003777
8	8	protein tyrosine phosphatase activity	GO:0004725	4.84×10-1	5.53×10-1	PTPMT1|0.71	1	232	107	37689	http://www.ebi.ac.uk/QuickGO/GTerm?id=GO:0004725
6	6	antiporter activity	GO:0015297	4.87×10-1	5.53×10-1	SLC7A5|0.63	1	234	107	37689	http://www.ebi.ac.uk/QuickGO/GTerm?id=GO:0015297
7	7	inorganic anion transmembrane transporter activity	GO:0015103	4.87×10-1	5.53×10-1	PCYOX1|0.61	1	234	107	37689	http://www.ebi.ac.uk/QuickGO/GTerm?id=GO:0015103
4	4	nucleoside-triphosphatase regulator activity	GO:0060589	5.01×10-1	5.68×10-1	ATP1B1|0.69;DNAJA3|0.69	2	590	107	37689	http://www.ebi.ac.uk/QuickGO/GTerm?id=GO:0060589
4	4	ubiquitinyl hydrolase activity	GO:0036459	5.08×10-1	5.75×10-1	USP39|0.69	1	249	107	37689	http://www.ebi.ac.uk/QuickGO/GTerm?id=GO:0036459
6	6	endopeptidase inhibitor activity	GO:0004866	5.15×10-1	5.80×10-1	SERPINH1|0.72	1	254	107	37689	http://www.ebi.ac.uk/QuickGO/GTerm?id=GO:0004866
5	5	peptidase activity, acting on L-amino acid peptides	GO:0070011	5.16×10-1	5.80×10-1	PSMA1|1.74;SRI|1.57;HM13|0.71;CTSS|0.7;CLPX|0.67	5	1669	107	37689	http://www.ebi.ac.uk/QuickGO/GTerm?id=GO:0070011
6	6	phosphatase activity	GO:0016791	5.16×10-1	5.80×10-1	ACP2|0.73;PTPMT1|0.71	2	607	107	37689	http://www.ebi.ac.uk/QuickGO/GTerm?id=GO:0016791
5	5	metal ion binding	GO:0046872	5.20×10-1	5.82×10-1	CLIP1|1.66;ZNF598|1.6;S100A11|1.58;SRI|1.57;S100A6|1.52;LPCAT1|0.74;MUT|0.74;FKBP10|0.73;ITGA5|0.73;GNS|0.73;CYBA|0.7;CARS2|0.7;DNAJA3|0.69;CYB5B|0.69;USP39|0.69;ETHE1|0.68;CLPX|0.67;FUS|0.67;PARP1|0.66;ASPH|0.63;TOP2A|0.6;EWSR1|0.53	22	7680	107	37689	http://www.ebi.ac.uk/QuickGO/GTerm?id=GO:0046872
5	5	endopeptidase regulator activity	GO:0061135	5.22×10-1	5.84×10-1	SERPINH1|0.72	1	259	107	37689	http://www.ebi.ac.uk/QuickGO/GTerm?id=GO:0061135
4	4	calmodulin binding	GO:0005516	5.28×10-1	5.89×10-1	EWSR1|0.53	1	263	107	37689	http://www.ebi.ac.uk/QuickGO/GTerm?id=GO:0005516
9	9	sodium ion transmembrane transporter activity	GO:0015081	5.32×10-1	5.92×10-1	ATP1B1|0.69	1	266	107	37689	http://www.ebi.ac.uk/QuickGO/GTerm?id=GO:0015081
4	4	peptidase activity	GO:0008233	5.36×10-1	5.95×10-1	PSMA1|1.74;SRI|1.57;HM13|0.71;CTSS|0.7;CLPX|0.67	5	1708	107	37689	http://www.ebi.ac.uk/QuickGO/GTerm?id=GO:0008233
5	5	peptidase inhibitor activity	GO:0030414	5.37×10-1	5.95×10-1	SERPINH1|0.72	1	270	107	37689	http://www.ebi.ac.uk/QuickGO/GTerm?id=GO:0030414
9	9	potassium ion transmembrane transporter activity	GO:0015079	5.53×10-1	6.10×10-1	ATP1B1|0.69	1	282	107	37689	http://www.ebi.ac.uk/QuickGO/GTerm?id=GO:0015079
3	3	sulfur compound binding	GO:1901681	5.53×10-1	6.10×10-1	DLD|0.73	1	282	107	37689	http://www.ebi.ac.uk/QuickGO/GTerm?id=GO:1901681
4	4	cation binding	GO:0043169	5.56×10-1	6.11×10-1	CLIP1|1.66;ZNF598|1.6;S100A11|1.58;SRI|1.57;S100A6|1.52;LPCAT1|0.74;MUT|0.74;FKBP10|0.73;ITGA5|0.73;GNS|0.73;CYBA|0.7;CARS2|0.7;DNAJA3|0.69;CYB5B|0.69;USP39|0.69;ETHE1|0.68;CLPX|0.67;FUS|0.67;PARP1|0.66;ASPH|0.63;TOP2A|0.6;EWSR1|0.53	22	7813	107	37689	http://www.ebi.ac.uk/QuickGO/GTerm?id=GO:0043169
7	7	zinc ion binding	GO:0008270	5.65×10-1	6.20×10-1	CLIP1|1.66;ZNF598|1.6;S100A6|1.52;USP39|0.69;FUS|0.67;PARP1|0.66;EWSR1|0.53	7	2487	107	37689	http://www.ebi.ac.uk/QuickGO/GTerm?id=GO:0008270
4	4	protein domain specific binding	GO:0019904	5.76×10-1	6.31×10-1	DBNL|1.6;CYBA|0.7	2	678	107	37689	http://www.ebi.ac.uk/QuickGO/GTerm?id=GO:0019904
9	9	purine NTP-dependent helicase activity	GO:0070035	5.79×10-1	6.31×10-1	DHX30|0.72	1	303	107	37689	http://www.ebi.ac.uk/QuickGO/GTerm?id=GO:0070035
10	10	ATP-dependent helicase activity	GO:0008026	5.79×10-1	6.31×10-1	DHX30|0.72	1	303	107	37689	http://www.ebi.ac.uk/QuickGO/GTerm?id=GO:0008026
6	6	sequence-specific DNA binding	GO:0043565	6.04×10-1	6.57×10-1	SMARCA4|0.74;HDAC2|0.73;YBX3|0.72;TOP1|0.68	4	1469	107	37689	http://www.ebi.ac.uk/QuickGO/GTerm?id=GO:0043565
6	6	ubiquitin protein ligase activity	GO:0061630	6.09×10-1	6.61×10-1	UBE2K|1.53	1	329	107	37689	http://www.ebi.ac.uk/QuickGO/GTerm?id=GO:0061630
5	5	ubiquitin-like protein ligase activity	GO:0061659	6.13×10-1	6.63×10-1	UBE2K|1.53	1	332	107	37689	http://www.ebi.ac.uk/QuickGO/GTerm?id=GO:0061659
6	6	transition metal ion binding	GO:0046914	6.16×10-1	6.65×10-1	CLIP1|1.66;ZNF598|1.6;S100A6|1.52;USP39|0.69;ETHE1|0.68;FUS|0.67;PARP1|0.66;EWSR1|0.53	8	2976	107	37689	http://www.ebi.ac.uk/QuickGO/GTerm?id=GO:0046914
7	7	inorganic cation transmembrane transporter activity	GO:0022890	6.17×10-1	6.65×10-1	ATP6V0D1|0.74;ATP5L|0.72;ATP1B1|0.69	3	1115	107	37689	http://www.ebi.ac.uk/QuickGO/GTerm?id=GO:0022890
5	5	nucleotidyltransferase activity	GO:0016779	6.21×10-1	6.68×10-1	PNPT1|0.69	1	340	107	37689	http://www.ebi.ac.uk/QuickGO/GTerm?id=GO:0016779
7	7	iron ion binding	GO:0005506	6.31×10-1	6.77×10-1	ETHE1|0.68	1	349	107	37689	http://www.ebi.ac.uk/QuickGO/GTerm?id=GO:0005506
4	4	peptide binding	GO:0042277	6.43×10-1	6.89×10-1	SLC7A5|0.63	1	361	107	37689	http://www.ebi.ac.uk/QuickGO/GTerm?id=GO:0042277
6	6	magnesium ion binding	GO:0000287	6.54×10-1	6.98×10-1	TOP2A|0.6	1	371	107	37689	http://www.ebi.ac.uk/QuickGO/GTerm?id=GO:0000287
8	8	motor activity	GO:0003774	6.56×10-1	6.98×10-1	KIF2A|0.71	1	373	107	37689	http://www.ebi.ac.uk/QuickGO/GTerm?id=GO:0003774
4	4	oxidoreductase activity, acting on paired donors, with incorporation or reduction of molecular oxygen	GO:0016705	6.57×10-1	6.98×10-1	ASPH|0.63	1	374	107	37689	http://www.ebi.ac.uk/QuickGO/GTerm?id=GO:0016705
5	5	transferase activity, transferring acyl groups other than amino-acyl groups	GO:0016747	6.57×10-1	6.98×10-1	LPCAT1|0.74	1	375	107	37689	http://www.ebi.ac.uk/QuickGO/GTerm?id=GO:0016747
5	5	phosphoric ester hydrolase activity	GO:0042578	6.88×10-1	7.28×10-1	ACP2|0.73;PTPMT1|0.71	2	833	107	37689	http://www.ebi.ac.uk/QuickGO/GTerm?id=GO:0042578
5	5	actin binding	GO:0003779	6.97×10-1	7.37×10-1	DBNL|1.6;TAGLN2|1.51	2	848	107	37689	http://www.ebi.ac.uk/QuickGO/GTerm?id=GO:0003779
5	5	nuclease activity	GO:0004518	7.34×10-1	7.74×10-1	PNPT1|0.69	1	463	107	37689	http://www.ebi.ac.uk/QuickGO/GTerm?id=GO:0004518
3	3	structural constituent of ribosome	GO:0003735	7.54×10-1	7.93×10-1	MRPL21|0.74	1	490	107	37689	http://www.ebi.ac.uk/QuickGO/GTerm?id=GO:0003735
6	6	GTP binding	GO:0005525	7.60×10-1	7.98×10-1	TUFM|0.71;LSG1|0.7	2	959	107	37689	http://www.ebi.ac.uk/QuickGO/GTerm?id=GO:0005525
7	7	protein serine/threonine kinase activity	GO:0004674	7.70×10-1	8.06×10-1	SLK|1.69;CDK1|0.69	2	979	107	37689	http://www.ebi.ac.uk/QuickGO/GTerm?id=GO:0004674
7	6,7	guanyl ribonucleotide binding	GO:0032561	7.71×10-1	8.06×10-1	TUFM|0.71;LSG1|0.7	2	982	107	37689	http://www.ebi.ac.uk/QuickGO/GTerm?id=GO:0032561
6	6	guanyl nucleotide binding	GO:0019001	7.79×10-1	8.13×10-1	TUFM|0.71;LSG1|0.7	2	998	107	37689	http://www.ebi.ac.uk/QuickGO/GTerm?id=GO:0019001
3	3	transferase activity	GO:0016740	7.90×10-1	8.23×10-1	SLK|1.69;UBE2K|1.53;DDOST|0.74;LPCAT1|0.74;OAT|0.73;STT3A|0.73;TRRAP|0.72;NDUFA10|0.71;CDK1|0.69;PNPT1|0.69;CS|0.68;PARP1|0.66;GSTK1|0.56	13	5450	107	37689	http://www.ebi.ac.uk/QuickGO/GTerm?id=GO:0016740
5	5	GTPase regulator activity	GO:0030695	7.99×10-1	8.30×10-1	DNAJA3|0.69	1	560	107	37689	http://www.ebi.ac.uk/QuickGO/GTerm?id=GO:0030695
5	5	secondary active transmembrane transporter activity	GO:0015291	8.07×10-1	8.36×10-1	SLC7A5|0.63	1	574	107	37689	http://www.ebi.ac.uk/QuickGO/GTerm?id=GO:0015291
5	5	ubiquitin-protein transferase activity	GO:0004842	8.58×10-1	8.86×10-1	UBE2K|1.53	1	680	107	37689	http://www.ebi.ac.uk/QuickGO/GTerm?id=GO:0004842
2	2	molecular transducer activity	GO:0060089	8.58×10-1	8.86×10-1	STMN1|1.67;PPP1R12A|1.54;CSPG4|0.69;SEC62|0.68;ITGB4|0.65;CD44|0.47	6	2979	107	37689	http://www.ebi.ac.uk/QuickGO/GTerm?id=GO:0060089
4	4	ubiquitin-like protein transferase activity	GO:0019787	8.71×10-1	8.97×10-1	UBE2K|1.53	1	713	107	37689	http://www.ebi.ac.uk/QuickGO/GTerm?id=GO:0019787
4	4	transferase activity, transferring phosphorus-containing groups	GO:0016772	8.90×10-1	9.14×10-1	SLK|1.69;TRRAP|0.72;NDUFA10|0.71;CDK1|0.69;PNPT1|0.69	5	2705	107	37689	http://www.ebi.ac.uk/QuickGO/GTerm?id=GO:0016772
5	5	kinase activity	GO:0016301	8.94×10-1	9.17×10-1	SLK|1.69;TRRAP|0.72;NDUFA10|0.71;CDK1|0.69	4	2281	107	37689	http://www.ebi.ac.uk/QuickGO/GTerm?id=GO:0016301
2	2	structural molecule activity	GO:0005198	8.96×10-1	9.17×10-1	MRPL21|0.74;ASPH|0.63	2	1335	107	37689	http://www.ebi.ac.uk/QuickGO/GTerm?id=GO:0005198
8	8	metal ion transmembrane transporter activity	GO:0046873	9.19×10-1	9.38×10-1	ATP1B1|0.69	1	874	107	37689	http://www.ebi.ac.uk/QuickGO/GTerm?id=GO:0046873
4	4	RNA polymerase II transcription factor activity, sequence-specific DNA binding	GO:0000981	9.28×10-1	9.46×10-1	YBX3|0.72	1	915	107	37689	http://www.ebi.ac.uk/QuickGO/GTerm?id=GO:0000981
5	5	phosphotransferase activity, alcohol group as acceptor	GO:0016773	9.37×10-1	9.52×10-1	SLK|1.69;TRRAP|0.72;CDK1|0.69	3	2062	107	37689	http://www.ebi.ac.uk/QuickGO/GTerm?id=GO:0016773
3	3	signal transducer activity	GO:0004871	9.45×10-1	9.59×10-1	STMN1|1.67;PPP1R12A|1.54;CSPG4|0.69;CD44|0.47	4	2619	107	37689	http://www.ebi.ac.uk/QuickGO/GTerm?id=GO:0004871
3	3	lipid binding	GO:0008289	9.57×10-1	9.69×10-1	ERLIN1|0.69	1	1087	107	37689	http://www.ebi.ac.uk/QuickGO/GTerm?id=GO:0008289
6	6	protein kinase activity	GO:0004672	9.62×10-1	9.72×10-1	SLK|1.69;CDK1|0.69	2	1754	107	37689	http://www.ebi.ac.uk/QuickGO/GTerm?id=GO:0004672
3	3	receptor activity	GO:0004872	9.73×10-1	9.81×10-1	SEC62|0.68;ITGB4|0.65;CD44|0.47	3	2443	107	37689	http://www.ebi.ac.uk/QuickGO/GTerm?id=GO:0004872
5	5	transmembrane signaling receptor activity	GO:0004888	9.96×10-1	9.99×10-1	CD44|0.47	1	1885	107	37689	http://www.ebi.ac.uk/QuickGO/GTerm?id=GO:0004888
4	4	signaling receptor activity	GO:0038023	9.98×10-1	9.99×10-1	CD44|0.47	1	2080	107	37689	http://www.ebi.ac.uk/QuickGO/GTerm?id=GO:0038023
3	3	transcription factor activity, sequence-specific DNA binding	GO:0003700	9.99×10-1	9.99×10-1	YBX3|0.72	1	2575	107	37689	http://www.ebi.ac.uk/QuickGO/GTerm?id=GO:0003700
2	2	nucleic acid binding transcription factor activity	GO:0001071	9.99×10-1	9.99×10-1	YBX3|0.72	1	2575	107	37689	http://www.ebi.ac.uk/QuickGO/GTerm?id=GO:0001071
GO, Gene Ontology.
